# Supplementary material for: Sex hormones drive changes in lipoprotein metabolism
Source: PubMed Central journal article supplement — iScience. 2021 Oct 11;24(11):103257. doi: 10.1016/j.isci.2021.103257 (PMC8567005; doi:10.1016/j.isci.2021.103257), 2021-10-11
Supplement: mmc1.pdf [file mmc1.pdf]

**iScience, Volume 24**

**Supplemental information**

**Sex hormones drive changes  
in lipoprotein metabolism**

**George A. Robinson, Junjie Peng, Hannah Peckham, Anna Radziszewska, Gary Butler, Ines Pineda-Torra, Elizabeth C. Jury, and Coziana Ciurtin**

## Supplemental Information

**Figure S1:** Logistic regression analysis between all gender comparisons, Related to Figure 2

**Figure S2:** Metabolites that overlap between all gender comparisons, Related to Figure 3

**Figure S3:** Sex differences in lipid metabolism are altered in young post-pubertal patients with autoimmune diseases, Related to Figure 2

**Table S1.** List of serum lipid metabolic biomarkers, Related to Figure 2-4

**Table S2:** Demographic comparison between pre-pubertal boys and girls, Related to Figure 2A

**Table S3:** Metabolites that overlap between gender group comparisons, Related to Figure 3A

**Table S4:** Logistic regression of ApoA1 adjusted for ethnicity, Related to Figure 3 and Figure S1

**Table S5:** Turners syndrome patient characteristics, Related to Figure 3F

**Table S6:** Key linking metabolite names with node numbers in network analysis, Related to Figure 4

**Table S7:** Demographic and clinical comparison between young post-pubertal men and women with juvenile-systemic lupus erythematosus, Related to Figure 1 and Figure S3

**Table S8:** Demographic and clinical comparison between young post-pubertal men and women with juvenile idiopathic arthritis, Related to Figure 1 and Figure S3

**Figure S1: Logistic regression analysis between all gender comparisons, Related to Figure 2**

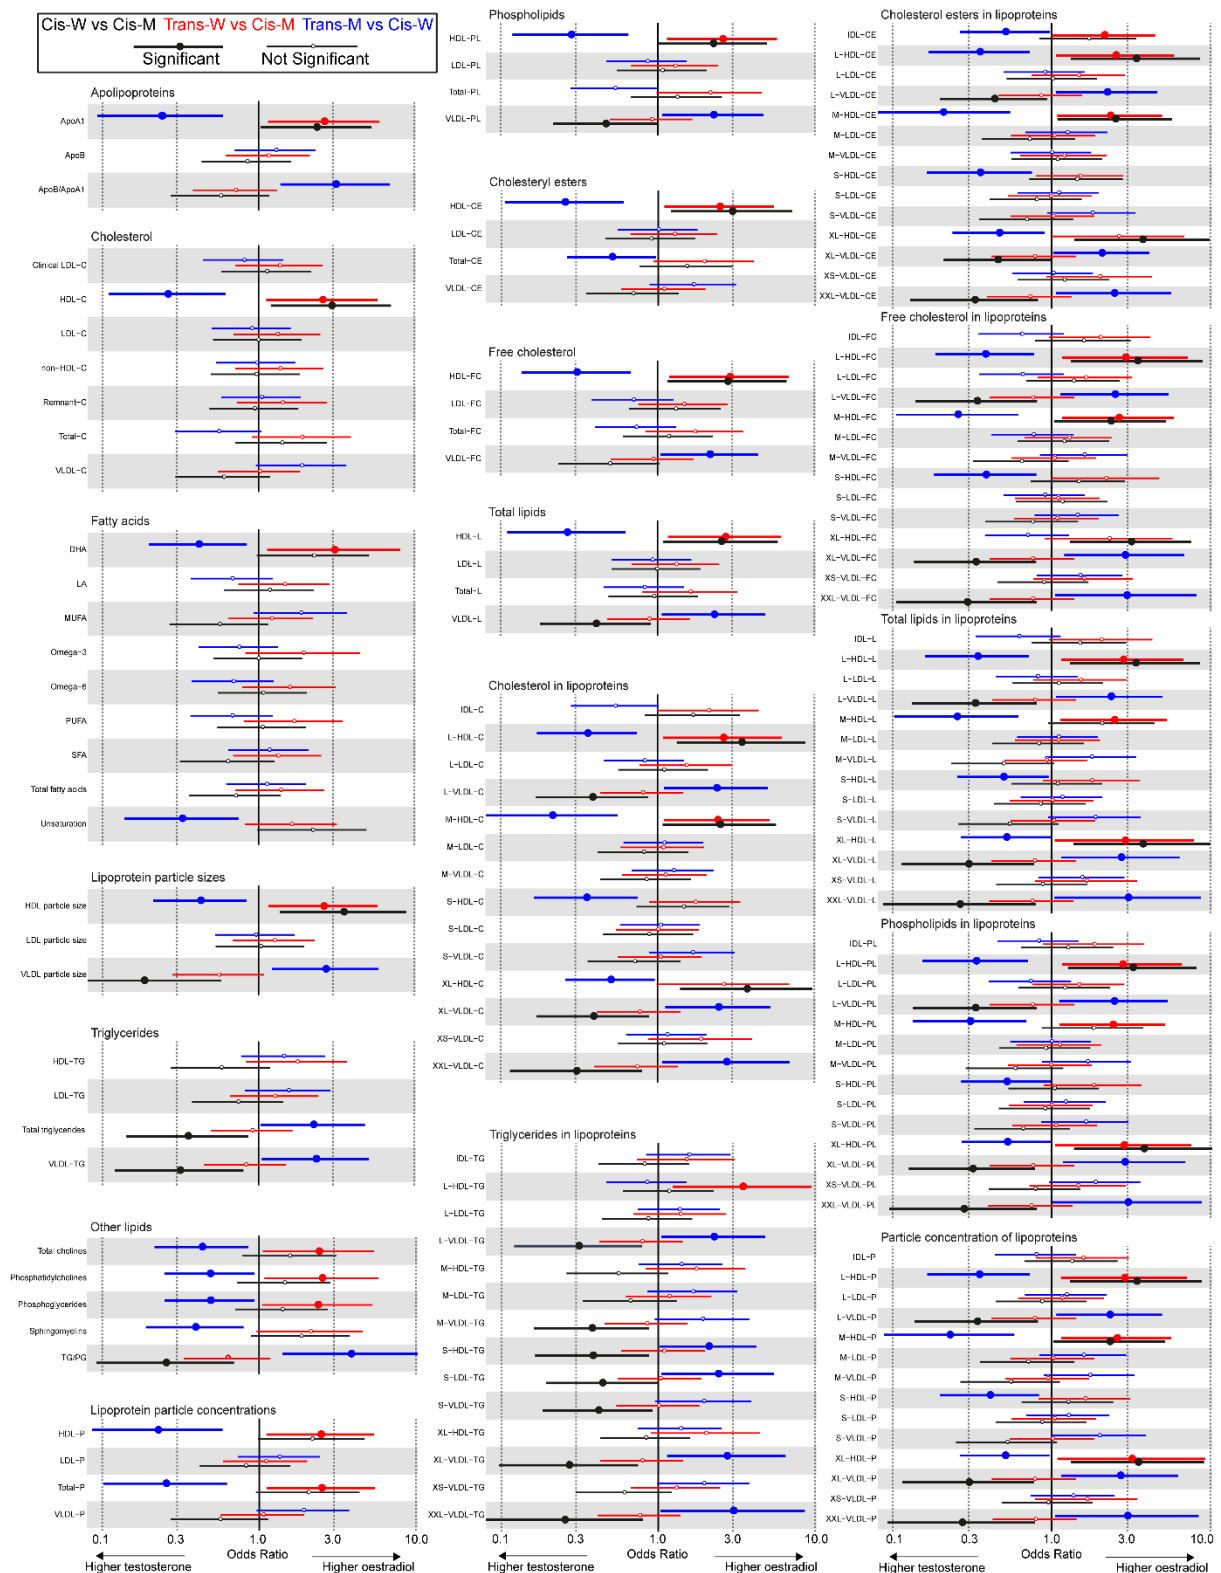

**Figure S1: Logistic regression analysis between all gender comparisons, Related to Figure 2.** Forest plot displaying odd ratios (OR) and 95% confidence intervals (CIs) of serum metabolites between 3 different young age matched gender comparisons: young post-pubertal cis-gendered men (Cis-M) and women (Cis-W) (n=15 and 17, black); young Cis-M and

transgender individuals undergoing cross-sex-hormone treatment with oestradiol, Trans-W (n=15 and 25, red); and young Cis-W and transgender individuals undergoing cross-sex-hormone treatment with testosterone, Trans-M (n=17 and 26). Measurements include specific fatty acids, cholesterol, triglycerides and phospholipids (mmol/l), apolipoproteins (g/l) and in-depth lipoprotein measurements including particle size (nm), concentration and lipid content (mmol/l). Statistically significant differences are denoted by solid filled and enlarged OR circles and thicker CI bands. Abbreviations: Apo, apolipoprotein; VLDL, very low density lipoprotein; IDL, intermediate density lipoprotein; LDL, low density lipoprotein; HDL, high density lipoprotein; XXL-VLDL, chylomicrons and extremely large VLDL; X-Large, very large; X-small, very small; PG (Phosphoglyceride), DHA, Docosahexaenoic acid; LA, Linoleic acid; PUFA, Polyunsaturated fatty acids; MUFA, Monounsaturated fatty acids; SFA, Saturated fatty acids; TG, triglycerides; PL, phospholipids, FC, free cholesterol, C, cholesterol, CE, cholesterol esters; P, particle; L, lipids.

**Figure S2: Metabolites that overlap between all gender comparisons, Related to Figure 3**

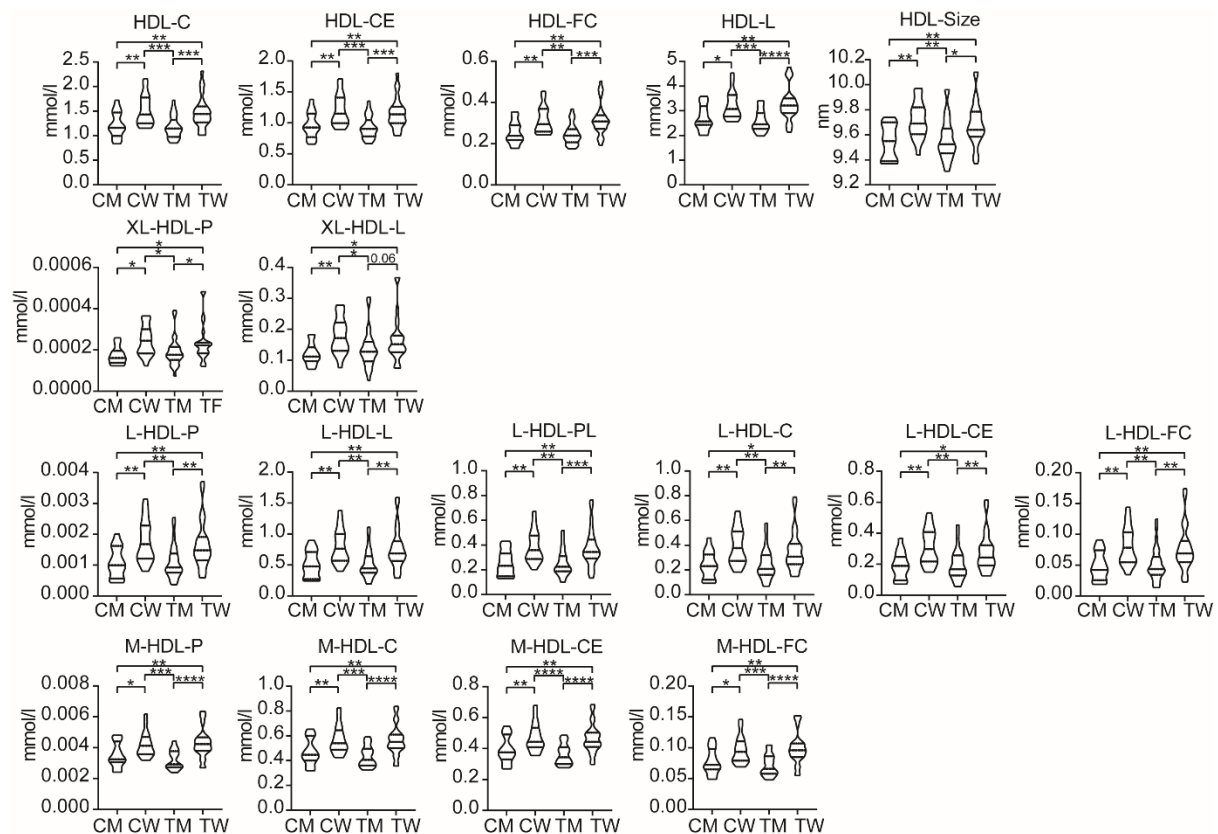

**Figure S2: Metabolites that overlap between all gender comparisons, Related to Figure 3.** Violin plots comparing levels of metabolites with full overlap (Venn diagram Figure 3A, Table S3) in young post-pubertal cis-men and cis-women (CM, n=15 and CW, n=17) and in age-matched young transgender individuals undergoing cross-sex-hormone treatment with oestradiol, trans-women (TF, n=25) or testosterone, trans-men (TM, n=26). One-way ANOVA, \* = P < 0.05, \*\* = P < 0.01, \*\*\* = P < 0.001, \*\*\*\* = P < 0.0001.

**Figure S3: Sex differences in lipid metabolism are altered in young post-pubertal patients with autoimmune diseases, Related to Figure 2**

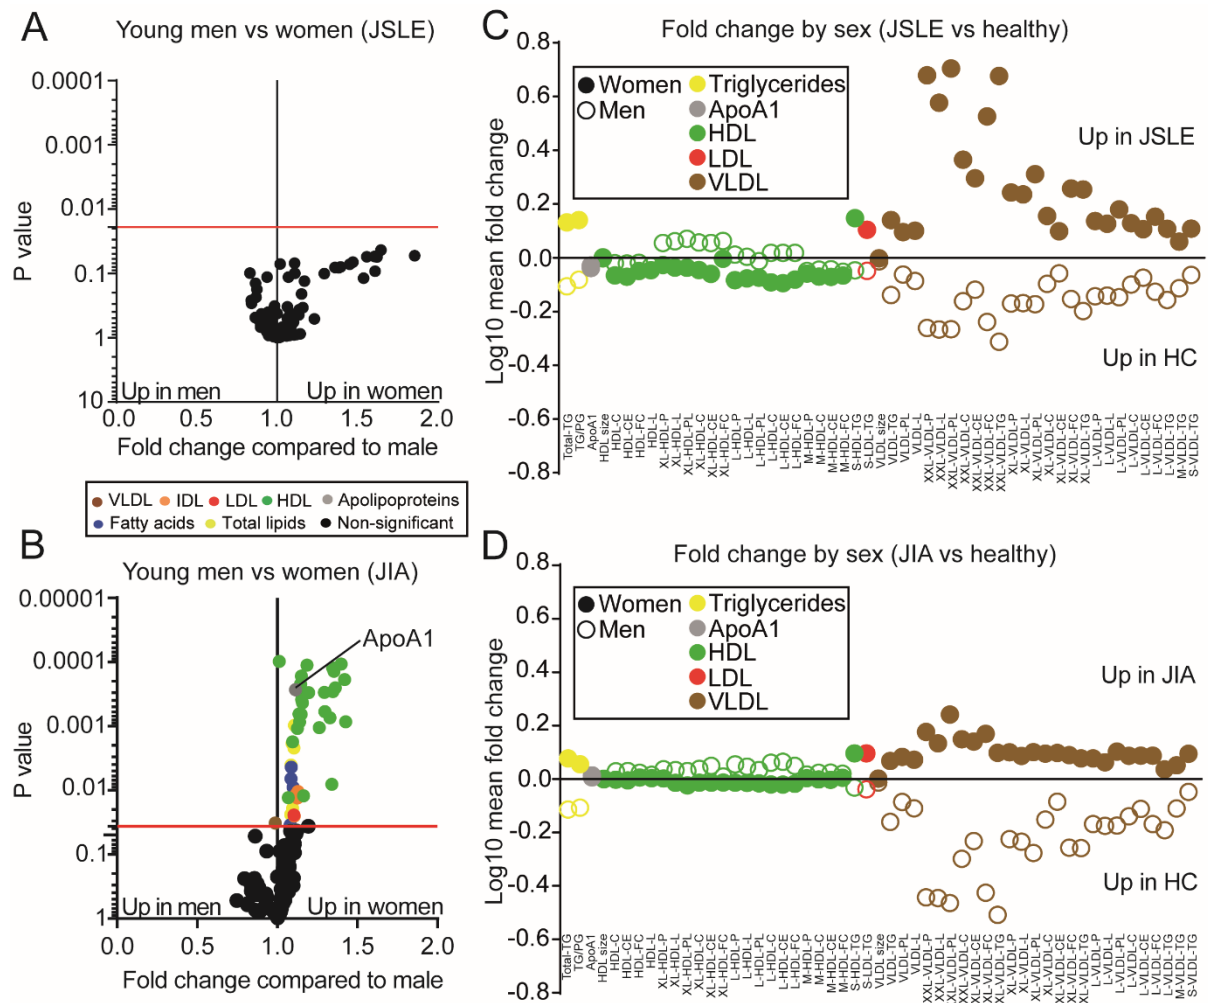

**Figure S3: Sex differences in lipid metabolism are altered in young post-pubertal patients with autoimmune diseases, Related to Figure 2.** Metabolites were measured in serum by Nightingale Metabolomics (Table S1) from young post-pubertal patients with juvenile-systemic lupus erythematosus (JSLE) and juvenile idiopathic arthritis (JIA). **(A-B)** Volcano plots displaying fold change of all metabolites and Log<sub>10</sub> p values from multiple unpaired t-tests comparing **(A)** young men (n=11) and women (n=22) with JSLE, or **(B)** young men (n=48) and women (n=73) with JIA. Bottom y-axis line, p=0.05; top y-axis line, adjusted p value threshold following 6% false discovery rate adjustment for multiple comparisons (Benjamini, Krieger and Yekutieli approach). Coloured dots represent significantly different metabolite groups. **(C-D)** Significant metabolites identified between young post-pubertal healthy men and women (Figure 2B) were compared to age matched young post-pubertal men and women with **(C)** JSLE (men JSLE/HC, n=12/15; women JSLE/HC, n=23/17), or **(D)** JIA (men JIA/HC, n=48/15; women JIA/HC, n=73/17). Data is displayed as log<sub>10</sub> mean fold change from healthy. Points are coloured by metabolite group. Points are represented as filled dots for women, hollow dots for men. Abbreviations: VL/I/L/HDL (very low/intermediate/low/high density lipoproteins), Apo (apolipoprotein).

**Table S1: List of serum lipid metabolic biomarkers, Related to Figure 2-4**

| Metabolite group                             | Metabolite           | Metabolite group                | Metabolite  | Metabolite |
|----------------------------------------------|----------------------|---------------------------------|-------------|------------|
| Cholesterol (mmol/l)                         | Total-C              | Lipoprotein subclasses (mmol/l) | XXL-VLDL-P  | L-LDL-C    |
|                                              | non-HDL-C            |                                 | XXL-VLDL-L  | L-LDL-CE   |
|                                              | Remnant-C            |                                 | XXL-VLDL-PL | L-LDL-FC   |
|                                              | VLDL-C               |                                 | XXL-VLDL-C  | L-LDL-TG   |
|                                              | Clinical LDL-C       |                                 | XXL-VLDL-CE | M-LDL-P    |
|                                              | LDL-C                |                                 | XXL-VLDL-FC | M-LDL-L    |
| Triglycerides (mmol/l)                       | HDL-C                | XXL-VLDL-TG                     | M-LDL-PL    |            |
|                                              | Total-TG             | XL-VLDL-P                       | M-LDL-C     |            |
|                                              | VLDL-TG              | XL-VLDL-L                       | M-LDL-CE    |            |
|                                              | LDL-TG               | XL-VLDL-PL                      | M-LDL-FC    |            |
|                                              | HDL-TG               | XL-VLDL-C                       | M-LDL-TG    |            |
| Phospholipids (mmol/l)                       | Total-PL             | XL-VLDL-CE                      | S-LDL-P     |            |
|                                              | VLDL-PL              | XL-VLDL-FC                      | S-LDL-L     |            |
|                                              | LDL-PL               | XL-VLDL-TG                      | S-LDL-PL    |            |
|                                              | HDL-PL               | L-VLDL-P                        | S-LDL-C     |            |
| Cholesteryl esters (mmol/l)                  | Total-CE             | L-VLDL-L                        | S-LDL-CE    |            |
|                                              | VLDL-CE              | L-VLDL-PL                       | S-LDL-FC    |            |
|                                              | LDL-CE               | L-VLDL-C                        | S-LDL-TG    |            |
|                                              | HDL-CE               | L-VLDL-CE                       | XL-HDL-P    |            |
| Free cholesterol (mmol/l)                    | Total-FC             | L-VLDL-FC                       | XL-HDL-L    |            |
|                                              | VLDL-FC              | L-VLDL-TG                       | XL-HDL-PL   |            |
|                                              | LDL-FC               | M-VLDL-P                        | XL-HDL-C    |            |
| Total lipids (mmol/l)                        | HDL-FC               | M-VLDL-L                        | XL-HDL-CE   |            |
|                                              | Total-L              | M-VLDL-PL                       | XL-HDL-FC   |            |
|                                              | VLDL-L               | M-VLDL-C                        | XL-HDL-TG   |            |
|                                              | LDL-L                | M-VLDL-CE                       | L-HDL-P     |            |
| Lipoprotein particle concentrations (mmol/l) | HDL-L                | M-VLDL-FC                       | L-HDL-L     |            |
|                                              | Total-P              | M-VLDL-TG                       | L-HDL-PL    |            |
|                                              | VLDL-P               | S-VLDL-P                        | L-HDL-C     |            |
| Lipoprotein particle sizes (nm)              | LDL-P                | S-VLDL-L                        | L-HDL-CE    |            |
|                                              | HDL-P                | S-VLDL-PL                       | L-HDL-FC    |            |
|                                              | VLDL size            | S-VLDL-C                        | L-HDL-TG    |            |
|                                              | LDL size             | S-VLDL-CE                       | M-HDL-P     |            |
| Other lipids (mmol/l)                        | HDL size             | S-VLDL-FC                       | M-HDL-L     |            |
|                                              | Phosphoglyceride     | S-VLDL-TG                       | M-HDL-PL    |            |
|                                              | TG/PG                | XS-VLDL-P                       | M-HDL-C     |            |
|                                              | Cholines             | XS-VLDL-L                       | M-HDL-CE    |            |
|                                              | Phosphatidylcholines | XS-VLDL-PL                      | M-HDL-FC    |            |
|                                              | Sphingomyelins       | XS-VLDL-C                       | M-HDL-TG    |            |
| Apolipoproteins (g/l)                        | ApoB                 | XS-VLDL-CE                      | S-HDL-P     |            |
|                                              | ApoA1                | XS-VLDL-FC                      | S-HDL-L     |            |
| Fatty acids (mmol/l)                         | ApoB/ApoA1           | XS-VLDL-TG                      | S-HDL-PL    |            |
|                                              | Total-FA             | IDL-P                           | S-HDL-C     |            |
|                                              | Unsaturation         | IDL-L                           | S-HDL-CE    |            |
|                                              | Omega-3              | IDL-PL                          | S-HDL-FC    |            |
|                                              | Omega-6              | IDL-C                           | S-HDL-TG    |            |
|                                              | PUFA                 | IDL-CE                          |             |            |
|                                              | MUFA                 | IDL-FC                          |             |            |
|                                              | SFA                  | IDL-TG                          |             |            |
|                                              | LA                   | L-LDL-P                         |             |            |
|                                              | DHA                  | L-LDL-L                         |             |            |
|                                              |                      | L-LDL-PL                        |             |            |
|                                              |                      |                                 |             |            |
|                                              |                      |                                 |             |            |
|                                              |                      |                                 |             |            |
|                                              |                      |                                 |             |            |

**Table S1: List of serum metabolic biomarkers, Related to Figure 2-4.** Nightingale Health metabolomics platform (<https://nightingalehealth.com/>) was used to measure >140 lipid biomarkers in serum. This service measures blood metabolic biomarkers using nuclear magnetic resonance (NMR) spectroscopy. The platform can simultaneously measure fatty acids, routine lipid measures (mmol/l), apolipoproteins (g/l) and in-depth lipoprotein measurements such as particle size (nm), concentration and lipid content (mmol/l). Abbreviations: Apo, apolipoprotein; VLDL, very low density lipoprotein; IDL, intermediate density lipoprotein; LDL, low density lipoprotein; HDL, high density lipoprotein; XXL-VLDL, chylomicrons and extremely large VLDL; X-Large, very large; X-small, very small; PG (Phosphoglyceride), DHA, Docosahexaenoic acid; LA, Linoleic acid; PUFA, Polyunsaturated fatty acids; MUFA, Monounsaturated fatty acids; SFA, Saturated fatty acids; TG, triglycerides; PL, phospholipids, FC, free cholesterol, C, cholesterol, CE, cholesterol esters; P, particle; L, lipids.

**Table S2: Demographic comparison between pre-pubertal boys and girls, Related to Figure 2A**

| <b>Demographic</b>           | <b>Boys</b> | <b>Girls</b> | <b>P value*</b> |
|------------------------------|-------------|--------------|-----------------|
| <b>Number</b>                | 10          | 10           | -               |
| <b>Age, mean (SD)</b>        | 8.9 (1.66)  | 8.4 (1.58)   | 0.85*           |
| <b>Ethnicity, number (%)</b> |             |              |                 |
| <b>White</b>                 | 6 (60)      | 5 (50)       | 1.00+           |
| <b>Asian</b>                 | 3 (30)      | 4 (40)       | 1.00+           |
| <b>Black</b>                 | 1 (10)      | 1 (10)       | 1.00+           |
| <b>Other</b>                 | 0 (0)       | 0 (0)        | 1.00+           |

**Table S2: Demographic comparison between pre-pubertal boys and girls, Related to Figure 2A.** \*Fisher's exact or +unpaired t-test.

**Table S3: Metabolites that overlap between gender group comparisons, Related to Figure 3A**

| Cis-Men vs Cis-Women<br>n=53<br>(Figure 2B) |           | Trans-Women<br>vs Cis-Men<br>n=29<br>(Figure 2C) | Trans-Men vs Cis-Women<br>n=70<br>(Figure 2D) |            | Total overlap<br>between all<br>comparisons<br>n=18<br>(Figure 3A) |
|---------------------------------------------|-----------|--------------------------------------------------|-----------------------------------------------|------------|--------------------------------------------------------------------|
| HDL-C                                       | S-LDL-TG  | HDL-C                                            | HDL-C                                         | XL-VLDL-CE | HDL-C                                                              |
| Total-TG                                    | XL-HDL-P  | HDL-PL                                           | Total-TG                                      | XL-VLDL-FC | HDL-CE                                                             |
| VLDL-TG                                     | XL-HDL-L  | HDL-CE                                           | VLDL-TG                                       | XL-VLDL-TG | HDL-FC                                                             |
| VLDL-PL                                     | XL-HDL-PL | HDL-FC                                           | VLDL-PL                                       | L-VLDL-P   | HDL-L                                                              |
| HDL-CE                                      | XL-HDL-C  | HDL-L                                            | HDL-PL                                        | L-VLDL-L   | HDL size                                                           |
| HDL-FC                                      | XL-HDL-CE | Total-P                                          | Total-CE                                      | L-VLDL-PL  | ApoA1                                                              |
| VLDL-L                                      | XL-HDL-FC | HDL-P                                            | HDL-CE                                        | L-VLDL-C   | XL-HDL-P                                                           |
| HDL-L                                       | L-HDL-P   | HDL size                                         | VLDL-FC                                       | L-VLDL-CE  | XL-HDL-L                                                           |
| VLDL size                                   | L-HDL-L   | Phosphoglyc                                      | HDL-FC                                        | L-VLDL-FC  | L-HDL-P                                                            |
| HDL size                                    | L-HDL-PL  | Cholines                                         | VLDL-L                                        | L-VLDL-TG  | L-HDL-L                                                            |
| TG/PG                                       | L-HDL-C   | Phosphatidylc                                    | HDL-L                                         | IDL-CE     | L-HDL-PL                                                           |
| ApoA1                                       | L-HDL-CE  | ApoA1                                            | Total-P                                       | S-LDL-TG   | L-HDL-C                                                            |
| XXL-VLDL-P                                  | L-HDL-FC  | DHA                                              | HDL-P                                         | XL-HDL-P   | L-HDL-CE                                                           |
| XXL-VLDL-L                                  | M-HDL-P   | XL-HDL-P                                         | VLDL size                                     | XL-HDL-L   | L-HDL-FC                                                           |
| XXL-VLDL-PL                                 | M-HDL-C   | XL-HDL-L                                         | HDL size                                      | XL-HDL-C   | M-HDL-P                                                            |
| XXL-VLDL-C                                  | M-HDL-CE  | XL-HDL-PL                                        | Phosphoglyc                                   | XL-HDL-CE  | M-HDL-C                                                            |
| XXL-VLDL-CE                                 | M-HDL-FC  | L-HDL-P                                          | TG/PG                                         | L-HDL-P    | M-HDL-CE                                                           |
| XXL-VLDL-FC                                 | S-HDL-TG  | L-HDL-L                                          | Cholines                                      | L-HDL-L    | M-HDL-FC                                                           |
| XXL-VLDL-TG                                 |           | L-HDL-PL                                         | Phosphatidylc                                 | L-HDL-PL   |                                                                    |
| XL-VLDL-P                                   |           | L-HDL-C                                          | Sphingomyelin                                 | L-HDL-C    |                                                                    |
| XL-VLDL-L                                   |           | L-HDL-CE                                         | ApoA1                                         | L-HDL-CE   |                                                                    |
| XL-VLDL-PL                                  |           | L-HDL-FC                                         | ApoB/ApoA1                                    | L-HDL-FC   |                                                                    |
| XL-VLDL-C                                   |           | L-HDL-TG                                         | Unsaturation                                  | M-HDL-P    |                                                                    |
| XL-VLDL-CE                                  |           | M-HDL-P                                          | DHA                                           | M-HDL-L    |                                                                    |
| XL-VLDL-FC                                  |           | M-HDL-L                                          | XXL-VLDL-P                                    | M-HDL-PL   |                                                                    |
| XL-VLDL-TG                                  |           | M-HDL-PL                                         | XXL-VLDL-L                                    | M-HDL-C    |                                                                    |
| L-VLDL-P                                    |           | M-HDL-C                                          | XXL-VLDL-PL                                   | M-HDL-CE   |                                                                    |
| L-VLDL-L                                    |           | M-HDL-CE                                         | XXL-VLDL-C                                    | M-HDL-FC   |                                                                    |
| L-VLDL-PL                                   |           | M-HDL-FC                                         | XXL-VLDL-CE                                   | S-HDL-P    |                                                                    |
| L-VLDL-C                                    |           |                                                  | XXL-VLDL-FC                                   | S-HDL-L    |                                                                    |
| L-VLDL-CE                                   |           |                                                  | XXL-VLDL-TG                                   | S-HDL-C    |                                                                    |
| L-VLDL-FC                                   |           |                                                  | XL-VLDL-P                                     | S-HDL-CE   |                                                                    |
| L-VLDL-TG                                   |           |                                                  | XL-VLDL-L                                     | S-HDL-FC   |                                                                    |
| M-VLDL-TG                                   |           |                                                  | XL-VLDL-PL                                    | S-HDL-TG   |                                                                    |
| S-VLDL-TG                                   |           |                                                  | XL-VLDL-C                                     | XL-VLDL-CE |                                                                    |

**Table S3: Metabolites that overlap between gender group comparisons, Related to Figure 3A.** Table displaying the statistically significant metabolites following 6% FDR correction for multiple testing from each young gender comparison from Figure 2B-D, as well as the 18 overlapping metabolites (Venn diagram Figure 3A) that were significantly different between all gender comparisons and validated by logistic regression analysis (Figure S1).



**Table S4: Logistic regression of ApoA1 adjusted for ethnicity, Related to Figure 3 and Figure S1**

| <u>ApoA1</u>           |             |             |               |             |
|------------------------|-------------|-------------|---------------|-------------|
| Cis-Men vs Cis-Women   |             |             |               |             |
| Beta                   | Beta SE     | Odds Ratio  | Odds Ratio SE | p-value     |
| 0.91500005             | 0.429417099 | 2.496775376 | 1.536361716   | 0.033105988 |
| Cis-Men vs Trans-Women |             |             |               |             |
| Beta                   | Beta SE     | Odds Ratio  | Odds Ratio SE | p-value     |
| 1.167385677            | 0.460968551 | 3.21358031  | 1.585608984   | 0.011326441 |
| Cis-Women vs Trans-Men |             |             |               |             |
| Beta                   | Beta SE     | Odds Ratio  | Odds Ratio SE | p-value     |
| -1.644784107           | 0.559258256 | 0.193054237 | 1.749374431   | 0.00327144  |

**Table S4: Logistic regression of ApoA1 adjusted for ethnicity, Related to Figure 3 and Figure S1.** Univariate logistic regression analysis, adjusted for ethnicity, displaying the beta values, odds ratios, standard error (SE) and p values of ApoA1 levels from different comparisons of young post-pubertal men (n=15), women (n=17), trans-men (n=26) and trans-women (n=25) Group-1/1A (n=30) and Group-2/2A (n=26).

**Table S5: Turners syndrome patient characteristics, Related to Figure 3F**

| Therapy                                                                    | Genetic diagnosis                             |
|----------------------------------------------------------------------------|-----------------------------------------------|
| Femoston, 1/10mg; Vitamin D, 1000Umg                                       | Turner variant, deletion of chromosome Xq21.3 |
| Femoston, 1/10mg; Vitamin D, 1000Umg/d;<br>Growth hormone, 1.8mg/d         | Turner mosaic, 45,X/46,X,idic(X)(p11.2)       |
| Growth hormone 1.4mg/d; Vitamin D, 400Umg/d                                | Turner syndrome, 45,X                         |
| Estradiol valerate 1mg; Growth hormone 2mg/d;<br>Fluooxetine               | Turner syndrome, 45,X                         |
| Femoston, 1/10mg; Vitamin D, 1000Umg/d;<br>Growth hormone, 1.6mg/d         | Turner variant, 46,X,idic(x)(p22.3)           |
| Ethinylestradiol 0.005mg/d; Growth hormone<br>1.8mg/d; Vitamin D 1000Umg/d | Turner syndrome, 45,X                         |
| Iron supplements                                                           | Turner mosaic, 45X/46XX                       |
| Growth hormone 1.5mg/d; Vitamin D, 1000Umg/d                               | Turner mosaic, 45,X/47,XXX                    |
| Vitamin D, 500Umg/d                                                        | Turner mosaic, 45,X/47,XXX                    |

**Table S5: Turners syndrome patient characteristics, Related to Figure 3F.** Age, current therapy and genetic diagnosis displayed for patients with Turners syndrome (mean age: 15.6, SD: 2.4) used for the analysis in [Figure 3F](#).

**Table S6: Key linking metabolite names with node numbers in network analysis, Related to Figure 4**

| No. | Metabolite     | No. | Metabolite  | No. | Metabolite | No. | Metabolite | No. | Metabolite | No. | Metabolite |
|-----|----------------|-----|-------------|-----|------------|-----|------------|-----|------------|-----|------------|
| 1   | Total-C        | 26  | LDL-L       | 51  | XL-VLDL-P  | 76  | S-VLDL-CE  | 101 | M-LDL-L    | 126 | L-HDL-FC   |
| 2   | non-HDL-C      | 27  | HDL-L       | 52  | XL-VLDL-L  | 77  | S-VLDL-FC  | 102 | M-LDL-PL   | 127 | L-HDL-TG   |
| 3   | Remnant-C      | 28  | Total-P     | 53  | XL-VLDL-PL | 78  | S-VLDL-TG  | 103 | M-LDL-C    | 128 | M-HDL-P    |
| 4   | VLDL-C         | 29  | VLDL-P      | 54  | XL-VLDL-C  | 79  | XS-VLDL-P  | 104 | M-LDL-CE   | 129 | M-HDL-L    |
| 5   | Clinical LDL-C | 30  | LDL-P       | 55  | XL-VLDL-CE | 80  | XS-VLDL-L  | 105 | M-LDL-FC   | 130 | M-HDL-PL   |
| 6   | LDL-C          | 31  | HDL-P       | 56  | XL-VLDL-FC | 81  | XS-VLDL-PL | 106 | M-LDL-TG   | 131 | M-HDL-C    |
| 7   | HDL-C          | 32  | ApoB        | 57  | XL-VLDL-TG | 82  | XS-VLDL-C  | 107 | S-LDL-P    | 132 | M-HDL-CE   |
| 8   | Total-TG       | 33  | ApoA1       | 58  | L-VLDL-P   | 83  | XS-VLDL-CE | 108 | S-LDL-L    | 133 | M-HDL-FC   |
| 9   | VLDL-TG        | 34  | ApoB/ApoA1  | 59  | L-VLDL-L   | 84  | XS-VLDL-FC | 109 | S-LDL-PL   | 134 | M-HDL-TG   |
| 10  | LDL-TG         | 35  | TotFA       | 60  | L-VLDL-PL  | 85  | XS-VLDL-TG | 110 | S-LDL-C    | 135 | S-HDL-P    |
| 11  | HDL-TG         | 36  | Unsat       | 61  | L-VLDL-C   | 86  | IDL-P      | 111 | S-LDL-CE   | 136 | S-HDL-L    |
| 12  | Total-PL       | 37  | Omega-3     | 62  | L-VLDL-CE  | 87  | IDL-L      | 112 | S-LDL-FC   | 137 | S-HDL-PL   |
| 13  | VLDL-PL        | 38  | Omega-6     | 63  | L-VLDL-FC  | 88  | IDL-PL     | 113 | S-LDL-TG   | 138 | S-HDL-C    |
| 14  | LDL-PL         | 39  | PUFA        | 64  | L-VLDL-TG  | 89  | IDL-C      | 114 | XL-HDL-P   | 139 | S-HDL-CE   |
| 15  | HDL-PL         | 40  | MUFA        | 65  | M-VLDL-P   | 90  | IDL-CE     | 115 | XL-HDL-L   | 140 | S-HDL-FC   |
| 16  | Total-CE       | 41  | SFA         | 66  | M-VLDL-L   | 91  | IDL-FC     | 116 | XL-HDL-PL  | 141 | S-HDL-TG   |
| 17  | VLDL-CE        | 42  | LA          | 67  | M-VLDL-PL  | 92  | IDL-TG     | 117 | XL-HDL-C   |     |            |
| 18  | LDL-CE         | 43  | DHA         | 68  | M-VLDL-C   | 93  | L-LDL-P    | 118 | XL-HDL-CE  |     |            |
| 19  | HDL-CE         | 44  | XXL-VLDL-P  | 69  | M-VLDL-CE  | 94  | L-LDL-L    | 119 | XL-HDL-FC  |     |            |
| 20  | Total-FC       | 45  | XXL-VLDL-L  | 70  | M-VLDL-FC  | 95  | L-LDL-PL   | 120 | XL-HDL-TG  |     |            |
| 21  | VLDL-FC        | 46  | XXL-VLDL-PL | 71  | M-VLDL-TG  | 96  | L-LDL-C    | 121 | L-HDL-P    |     |            |
| 22  | LDL-FC         | 47  | XXL-VLDL-C  | 72  | S-VLDL-P   | 97  | L-LDL-CE   | 122 | L-HDL-L    |     |            |
| 23  | HDL-FC         | 48  | XXL-VLDL-CE | 73  | S-VLDL-L   | 98  | L-LDL-FC   | 123 | L-HDL-PL   |     |            |
| 24  | Total-L        | 49  | XXL-VLDL-FC | 74  | S-VLDL-PL  | 99  | L-LDL-TG   | 124 | L-HDL-C    |     |            |
| 25  | VLDL-L         | 50  | XXL-VLDL-TG | 75  | S-VLDL-C   | 100 | M-LDL-P    | 125 | L-HDL-CE   |     |            |

**Table S6: Key linking metabolite names with node numbers in network analysis, Related to Figure 4.** List of metabolite names matched to network analysis in [Figure 4](#).

**Table S7: Demographic and clinical comparison between young post-pubertal men and women with juvenile-systemic lupus erythematosus, Related to Figure 1 and Figure S3**

| Demographic, n (%)                                | Men             | Women            | P value |
|---------------------------------------------------|-----------------|------------------|---------|
| Number                                            | 12              | 23               | -       |
| Age                                               | 18 (15-23)      | 20 (14-25)       | 0.39    |
| White                                             | 3 (25)          | 10 (43)          | 0.46*   |
| Asian                                             | 6 (50)          | 7 (30)           | 0.29*   |
| Black                                             | 3 (25)          | 4 (17)           | 0.67*   |
| Other                                             | 0 (0)           | 2 (9)            | 0.54*   |
| <b>Clinical feature, median (IQR)</b>             |                 |                  |         |
| Age of disease onset                              | 13 (0-18)       | 12 (5-18)        | 0.32    |
| SLEDAI score (NR<4)                               | 2 (0-10)        | 2 (0-10)         | 0.62    |
| ESR, mm/hr (NR=1.3-3.5)                           | 6.5 (2-38)      | 13 (2-127)       | 0.23    |
| dsDNA, IU/mL (NR=<50)                             | 47 (2-2827)     | 58 (1-17441)     | 0.46    |
| C3, g/L (NR=0.9-1.8)                              | 1 (0.33-1.36)   | 1.11 (0.35-1.64) | 0.28    |
| Lymphocyte count, 10 <sup>9</sup> /L (NR=1.3–3.5) | 1.49 (0.68-3.8) | 1.63 (0.59-3.08) | 0.78    |
| <b>Organ involvement, n (%)</b>                   |                 |                  |         |
| Neurological                                      | 1 (8)           | 1 (4)            | 1.00*   |
| Serositis                                         | 2 (17)          | 6 (26)           | 0.31*   |
| Cutaneous                                         | 10 (83)         | 21 (92)          | 0.69*   |
| Haematological                                    | 5 (42)          | 9 (39)           | 1.00*   |
| Musculoskeletal                                   | 9 (75)          | 21 (91)          | 0.31*   |
| Renal                                             | 4 (33)          | 5 (22)           | 0.69*   |
| <b>Treatment, n (%)</b>                           |                 |                  |         |
| Hydroxychloroquine                                | 11 (92)         | 20 (87)          | 1.00*   |
| Mycophenolate mofetil                             | 5 (42)          | 13 (57)          | 0.49*   |
| Prednisolone                                      | 5 (42)          | 12 (52)          | 0.72*   |
| Vitamin D                                         | 2 (17)          | 6 (26)           | 0.19*   |
| Methotrexate                                      | 1 (8)           | 2 (9)            | 1.00*   |
| Azathioprine                                      | 4 (33)          | 3 (13)           | 0.20*   |

**Table S7: Demographic and clinical comparison between young post-pubertal men and women with juvenile-systemic lupus erythematosus, Related to Figure 1 and Figure S3.**

Demographics and common clinical measures and treatments of disease are shown between a cohort of young post-pubertal men and women with juvenile-systemic lupus erythematosus (JSLE). Rituximab treatment was avoided in the cohort due to the known effects on lipids. Fisher's exact test\* or unpaired t-test was used. Abbreviations: NR: Normal range, ESR: Erythrocyte sedimentation rate, SLEDAI: Systemic Lupus Erythematosus Disease Activity Index, dsDNA: Anti-double-stranded-DNA antibodies, C3: Complement component 3.

**Table S8: Demographic and clinical comparison between young post-pubertal men and women with juvenile idiopathic arthritis, Related to Figure 1 and Figure S3**

| Demographic, n (%)                        | Men              | Women             | P value |
|-------------------------------------------|------------------|-------------------|---------|
| Number                                    | 48               | 73                | -       |
| Age                                       | 18 (16-22)       | 18 (16-24)        | 0.74    |
| White                                     | 37 (77)          | 54 (74)           | 0.83*   |
| Asian                                     | 5 (10)           | 5 (7)             | 0.52*   |
| Black                                     | 2 (4)            | 5 (7)             | 0.70*   |
| Other                                     | 4 (8)            | 9 (12)            | 0.56*   |
| <b>JIA subtype, n (%)</b>                 |                  |                   |         |
| Extended Oligoarticular Arthritis (EOA)   | 13 (27)          | 13 (18)           | 0.26*   |
| Enthesitis-related arthritis (ERA)        | 17 (35)          | 4 (5)             | 0.0001* |
| Oligoarthritis (OA)                       | 8 (17)           | 13 (18)           | >0.99*  |
| Polyarticular arthritis (PO)              | 8 (17)           | 36 (49)           | 0.0002* |
| Psoriatic arthritis (PS)                  | 2 (4)            | 7 (10)            | 0.32*   |
| <b>Clinical feature, median (IQR)</b>     |                  |                   |         |
| Disease duration, years                   | 9.53 (4.92-2.97) | 9.58 (4.14-13.27) | 0.88    |
| JADAS score                               | 2 (0-9)          | 5.65 (1.88-10.55) | 0.27    |
| Number of active joints                   | 0 (0-1)          | 0 (0-2)           | 0.48    |
| Patient global assessment, VAS            | 2 (0-5)          | 3 (0.25-5.6)      | 0.09    |
| Physician's global assessment, VAS (NR<4) | 0 (0-4.5)        | 1 (0-4)           | 0.71    |
| CRP, mg/L (NR<5)                          | 0.9 (0.6-3.78)   | 1.1 (0.6-2.4)     | 0.12    |
| ESR, mm/hr (NR=1.3-3.5)                   | 2 (2-5.5)        | 5 (2-14.25)       | 0.14    |
| Anti-nuclear antibodies+, n (%)           | 3 (6.25)         | 18 (24.66)        | 0.01*   |
| Rheumatoid factor+, n (%)                 | 0 (0)            | 4 (5.48)          | 0.15*   |
| HLA-B27+, n (%)                           | 7 (14.58)        | 2 (2.74)          | 0.03*   |
| <b>Treatment, n (%)</b>                   |                  |                   |         |
| Prednisolone                              | 0 (0)            | 0 (0)             | >0.99*  |
| Methotrexate                              | 22 (46)          | 42 (58)           | 0.26*   |
| Biologic therapy                          | 0 (0)            | 0 (0)             | >0.99*  |

**Table S8: Demographic and clinical comparison between young post-pubertal men and women with juvenile idiopathic arthritis, Related to Figure 1 and Figure S3.**

Demographics and common clinical measures and treatments of disease are shown between a cohort of young post-pubertal men and women with juvenile idiopathic arthritis (JIA). Patients on biologic therapy (eg. tocilizumab, anti-TNF $\alpha$ , rituximab etc.) were avoided in the cohorts due to their known effects on lipids. Fisher's exact test\* or unpaired t-test was used. Abbreviations: NR: Normal range, ESR: Erythrocyte sedimentation rate, CRP: C-reactive protein, JADAS: Juvenile Arthritis Disease Activity Score, VAS: Visual Analogue Scale.

## Supplemental Data

**Table SD1:** Metabolites significantly associated with young post-pubertal cis-men and cis-women, Related to Figure 2B

**Table SD2:** Metabolites significantly altered by hormone treatment in young trans-women, Related to Figure 2C

**Table SD3:** Metabolites significantly altered by hormone treatment in young trans-men, Related to Figure 2D

**Table SD4:** List of non-significant p values from the comparison of cis-men vs trans-men and cis-women vs trans-women, Related to Figure 2

**Table SD1: Metabolites significantly associated with young post-pubertal cis-men and cis-women, Related to Figure 2B**

| Metabolite group                             | Metabolite      | Mean (men) | SD (men) | Mean (women) | SD (women) | Fold change (from men) | P value (t-test) |
|----------------------------------------------|-----------------|------------|----------|--------------|------------|------------------------|------------------|
| Cholesterol (mmol/l)                         | Total-C         | 3.8573     | 0.8579   | 4.1247       | 0.5856     | 1.0693                 | 0.3065           |
|                                              | non-HDL-C       | 2.6387     | 0.8153   | 2.6047       | 0.5164     | 0.9871                 | 0.8876           |
|                                              | Remnant-C       | 1.1409     | 0.3971   | 1.1165       | 0.2609     | 0.9786                 | 0.8364           |
|                                              | VLDL-C          | 0.5232     | 0.2346   | 0.4096       | 0.1622     | 0.7829                 | 0.1181           |
|                                              | Clinical LDL-C  | 2.0653     | 0.6826   | 2.1359       | 0.4249     | 1.0342                 | 0.7247           |
|                                              | LDL-C           | 1.4971     | 0.4271   | 1.4912       | 0.2685     | 0.9961                 | 0.9626           |
|                                              | HDL-C           | 1.2189     | 0.2620   | 1.5188       | 0.3117     | 1.2461                 | 0.0065           |
| Triglycerides (mmol/l)                       | Total-TG        | 1.2637     | 0.5867   | 0.7899       | 0.3362     | 0.6251                 | 0.0079           |
|                                              | VLDL-TG         | 0.9639     | 0.5106   | 0.5219       | 0.2903     | 0.5415                 | 0.0047           |
|                                              | LDL-TG          | 0.1183     | 0.0336   | 0.1090       | 0.0202     | 0.9217                 | 0.3467           |
|                                              | HDL-TG          | 0.1069     | 0.0381   | 0.0868       | 0.0299     | 0.8124                 | 0.1061           |
| Phospholipids (mmol/l)                       | Total-PL        | 2.5013     | 0.4305   | 2.6159       | 0.3327     | 1.0458                 | 0.4033           |
|                                              | VLDL-PL         | 0.3783     | 0.1782   | 0.2570       | 0.1156     | 0.6793                 | 0.0278           |
|                                              | LDL-PL          | 0.5233     | 0.1353   | 0.5305       | 0.0842     | 1.0138                 | 0.8561           |
|                                              | HDL-PL          | 1.3867     | 0.2613   | 1.6029       | 0.2732     | 1.1560                 | 0.0298           |
| Cholesteryl esters (mmol/l)                  | Total-CE        | 2.8307     | 0.6127   | 3.0641       | 0.4319     | 1.0825                 | 0.2183           |
|                                              | VLDL-CE         | 0.2990     | 0.1327   | 0.2521       | 0.0932     | 0.8432                 | 0.2522           |
|                                              | LDL-CE          | 1.1041     | 0.3194   | 1.0705       | 0.2039     | 0.9696                 | 0.7226           |
|                                              | HDL-CE          | 0.9649     | 0.2101   | 1.2059       | 0.2489     | 1.2499                 | 0.0063           |
| Free cholesterol (mmol/l)                    | Total-FC        | 1.0257     | 0.2511   | 1.0606       | 0.1600     | 1.0340                 | 0.6383           |
|                                              | VLDL-FC         | 0.2241     | 0.1049   | 0.1573       | 0.0697     | 0.7019                 | 0.0401           |
|                                              | LDL-FC          | 0.3943     | 0.1114   | 0.4198       | 0.0681     | 1.0646                 | 0.4351           |
|                                              | HDL-FC          | 0.2541     | 0.0552   | 0.3142       | 0.0654     | 1.2368                 | 0.0091           |
| Total lipids (mmol/l)                        | Total-L         | 7.6233     | 1.6180   | 7.5300       | 1.1029     | 0.9878                 | 0.8485           |
|                                              | VLDL-L          | 1.8638     | 0.8787   | 1.1874       | 0.5555     | 0.6371                 | 0.0132           |
|                                              | LDL-L           | 2.1400     | 0.5864   | 2.1294       | 0.3645     | 0.9951                 | 0.9509           |
|                                              | HDL-L           | 2.7113     | 0.5133   | 3.2100       | 0.5770     | 1.1839                 | 0.0155           |
| Lipoprotein particle concentrations (mmol/l) | Total-P         | 0.0158     | 0.0021   | 0.0174       | 0.0023     | 1.1028                 | 0.0454           |
|                                              | VLDL-P          | 0.0001     | 0.0000   | 0.0001       | 0.0000     | 0.7955                 | 0.085            |
|                                              | LDL-P           | 0.0010     | 0.0003   | 0.0010       | 0.0002     | 0.9477                 | 0.5257           |
|                                              | HDL-P           | 0.0145     | 0.0021   | 0.0161       | 0.0022     | 1.1164                 | 0.0349           |
| Lipoprotein particle sizes (nm)              | VLDL size       | 39.5400    | 1.3168   | 37.7353      | 1.1297     | 0.9544                 | 0.0002           |
|                                              | LDL size        | 23.8800    | 0.0862   | 23.8824      | 0.0951     | 1.0001                 | 0.9423           |
|                                              | HDL size        | 9.5427     | 0.1360   | 9.7165       | 0.1482     | 1.0182                 | 0.0017           |
| Other lipids (mmol/l)                        | PG              | 2.0320     | 0.3469   | 2.1494       | 0.3075     | 1.0578                 | 0.3181           |
|                                              | TG/PG           | 0.6153     | 0.2457   | 0.3648       | 0.1384     | 0.5928                 | 0.0011           |
|                                              | Cholines        | 2.3167     | 0.3520   | 2.4759       | 0.3189     | 1.0687                 | 0.1895           |
|                                              | Phosphatidylcho | 1.9180     | 0.3251   | 2.0388       | 0.2929     | 1.0630                 | 0.2774           |
|                                              | Sphingomyelins  | 0.4077     | 0.0604   | 0.4422       | 0.0463     | 1.0845                 | 0.0783           |
| Apolipoproteins (g/l)                        | ApoB            | 0.6958     | 0.1976   | 0.6640       | 0.1235     | 0.9543                 | 0.5843           |
|                                              | ApoA1           | 1.3467     | 0.2014   | 1.5265       | 0.2214     | 1.1335                 | 0.0233           |
|                                              | ApoB/ApoA1      | 0.5277     | 0.1727   | 0.4433       | 0.1042     | 0.8400                 | 0.0999           |
|                                              | Total-FA        | 10.8300    | 2.4677   | 10.0488      | 1.6107     | 0.9279                 | 0.2919           |
| Fatty acids (mmol/l)                         | Unsaturation    | 1.2720     | 0.0655   | 1.3188       | 0.0531     | 1.0368                 | 0.0332           |
|                                              | Omega-3         | 0.3593     | 0.0983   | 0.3578       | 0.1290     | 0.9958                 | 0.971            |
|                                              | Omega-6         | 4.1287     | 0.6732   | 4.1665       | 0.5693     | 1.0092                 | 0.8645           |
|                                              | PUFA            | 4.4873     | 0.7466   | 4.5247       | 0.6547     | 1.0083                 | 0.8811           |
|                                              | MUFA            | 2.7093     | 0.8727   | 2.2794       | 0.4737     | 0.8413                 | 0.0885           |
|                                              | SFA             | 3.6227     | 0.9593   | 3.2335       | 0.5712     | 0.8926                 | 0.1676           |
|                                              | LA              | 3.4193     | 0.6324   | 3.5241       | 0.5940     | 1.0306                 | 0.6325           |
|                                              | DHA             | 0.1962     | 0.0314   | 0.2298       | 0.0509     | 1.1711                 | 0.0349           |
|                                              | XXL-VLDL-P      | 0.0000     | 0.0000   | 0.0000       | 0.0000     | 0.1957                 | 0.0041           |
|                                              | XXL-VLDL-L      | 0.1859     | 0.1824   | 0.0400       | 0.0680     | 0.2150                 | 0.0045           |
|                                              | XXL-VLDL-PL     | 0.0241     | 0.0249   | 0.0041       | 0.0090     | 0.1704                 | 0.0042           |
|                                              | XXL-VLDL-C      | 0.0422     | 0.0344   | 0.0138       | 0.0151     | 0.3260                 | 0.0043           |
|                                              | XXL-VLDL-CE     | 0.0257     | 0.0194   | 0.0100       | 0.0093     | 0.3900                 | 0.0058           |
| XXL-VLDL-FC                                  | 0.0165          | 0.0155     | 0.0038   | 0.0062       | 0.2273     | 0.004                  |                  |
| XXL-VLDL-TG                                  | 0.1198          | 0.1245     | 0.0222   | 0.0450       | 0.1850     | 0.0051                 |                  |
| XL-VLDL-P                                    | 0.0000          | 0.0000     | 0.0000   | 0.0000       | 0.4028     | 0.0034                 |                  |
| XL-VLDL-L                                    | 0.2089          | 0.1404     | 0.0832   | 0.0793       | 0.3984     | 0.0035                 |                  |
| XL-VLDL-PL                                   | 0.0352          | 0.0262     | 0.0124   | 0.0142       | 0.3507     | 0.0039                 |                  |
| XL-VLDL-C                                    | 0.0472          | 0.0287     | 0.0244   | 0.0179       | 0.5171     | 0.0103                 |                  |
| XL-VLDL-CE                                   | 0.0266          | 0.0146     | 0.0163   | 0.0100       | 0.6148     | 0.0264                 |                  |
| XL-VLDL-FC                                   | 0.0206          | 0.0144     | 0.0081   | 0.0081       | 0.3911     | 0.0044                 |                  |
| XL-VLDL-TG                                   | 0.1266          | 0.0878     | 0.0465   | 0.0481       | 0.3669     | 0.0028                 |                  |
| L-VLDL-P                                     | 0.0000          | 0.0000     | 0.0000   | 0.0000       | 0.5131     | 0.0055                 |                  |
| L-VLDL-L                                     | 0.3621          | 0.1984     | 0.1832   | 0.1279       | 0.5061     | 0.0046                 |                  |
| L-VLDL-PL                                    | 0.0689          | 0.0414     | 0.0320   | 0.0258       | 0.4640     | 0.0045                 |                  |
| L-VLDL-C                                     | 0.0884          | 0.0490     | 0.0475   | 0.0336       | 0.5368     | 0.0091                 |                  |
| L-VLDL-CE                                    | 0.0429          | 0.0234     | 0.0250   | 0.0171       | 0.5836     | 0.0186                 |                  |
| L-VLDL-FC                                    | 0.0456          | 0.0260     | 0.0224   | 0.0166       | 0.4913     | 0.0048                 |                  |
| L-VLDL-TG                                    | 0.2048          | 0.1105     | 0.1040   | 0.0700       | 0.5079     | 0.004                  |                  |
| M-VLDL-P                                     | 0.0000          | 0.0000     | 0.0000   | 0.0000       | 0.7611     | 0.0772                 |                  |
| M-VLDL-L                                     | 0.5295          | 0.2196     | 0.3860   | 0.1602       | 0.7289     | 0.0415                 |                  |
| M-VLDL-PL                                    | 0.1055          | 0.0485     | 0.0814   | 0.0340       | 0.7717     | 0.111                  |                  |
| M-VLDL-C                                     | 0.1188          | 0.0610     | 0.1089   | 0.0417       | 0.9169     | 0.5931                 |                  |
| M-VLDL-CE                                    | 0.0587          | 0.0345     | 0.0609   | 0.0219       | 1.0379     | 0.8269                 |                  |
| M-VLDL-FC                                    | 0.0600          | 0.0287     | 0.0481   | 0.0205       | 0.8005     | 0.1805                 |                  |
| M-VLDL-TG                                    | 0.3055          | 0.1315     | 0.1957   | 0.0899       | 0.6406     | 0.0092                 |                  |
| S-VLDL-P                                     | 0.0000          | 0.0000     | 0.0000   | 0.0000       | 0.7778     | 0.0577                 |                  |
| S-VLDL-L                                     | 0.3415          | 0.1215     | 0.2707   | 0.0902       | 0.7928     | 0.0691                 |                  |
| S-VLDL-PL                                    | 0.0771          | 0.0283     | 0.0657   | 0.0207       | 0.8522     | 0.1993                 |                  |
| S-VLDL-C                                     | 0.1119          | 0.0455     | 0.0970   | 0.0332       | 0.8673     | 0.2963                 |                  |
| S-VLDL-CE                                    | 0.0672          | 0.0280     | 0.0572   | 0.0211       | 0.8520     | 0.2615                 |                  |
| S-VLDL-FC                                    | 0.0446          | 0.0176     | 0.0399   | 0.0125       | 0.8930     | 0.3788                 |                  |
| S-VLDL-TG                                    | 0.1524          | 0.0577     | 0.1079   | 0.0392       | 0.7078     | 0.015                  |                  |
| XS-VLDL-P                                    | 0.0000          | 0.0000     | 0.0000   | 0.0000       | 0.9804     | 0.8403                 |                  |

|  |            |        |        |        |        |        |        |
|--|------------|--------|--------|--------|--------|--------|--------|
|  | XS-VLDL-L  | 0.2359 | 0.0803 | 0.2250 | 0.0574 | 0.9537 | 0.658  |
|  | XS-VLDL-PL | 0.0674 | 0.0247 | 0.0615 | 0.0184 | 0.9127 | 0.4475 |
|  | XS-VLDL-C  | 0.1147 | 0.0430 | 0.1179 | 0.0283 | 1.0277 | 0.8042 |
|  | XS-VLDL-CE | 0.0779 | 0.0304 | 0.0826 | 0.0191 | 1.0606 | 0.5978 |
|  | XS-VLDL-FC | 0.0367 | 0.0131 | 0.0352 | 0.0094 | 0.9579 | 0.7009 |
|  | XS-VLDL-TG | 0.0539 | 0.0172 | 0.0457 | 0.0126 | 0.8472 | 0.1305 |
|  | IDL-P      | 0.0002 | 0.0001 | 0.0002 | 0.0000 | 1.0708 | 0.3936 |
|  | IDL-L      | 0.9091 | 0.2695 | 1.0041 | 0.1655 | 1.1046 | 0.2325 |
|  | IDL-PL     | 0.2138 | 0.0637 | 0.2263 | 0.0359 | 1.0584 | 0.4932 |
|  | IDL-C      | 0.6180 | 0.1918 | 0.7058 | 0.1231 | 1.1420 | 0.1294 |
|  | IDL-CE     | 0.4629 | 0.1452 | 0.5323 | 0.0972 | 1.1500 | 0.1186 |
|  | IDL-FC     | 0.1550 | 0.0474 | 0.1735 | 0.0264 | 1.1194 | 0.1763 |
|  | IDL-TG     | 0.0768 | 0.0215 | 0.0725 | 0.0143 | 0.9447 | 0.511  |
|  | L-LDL-P    | 0.0006 | 0.0002 | 0.0006 | 0.0001 | 0.9610 | 0.6355 |
|  | L-LDL-L    | 1.3267 | 0.3641 | 1.3562 | 0.2299 | 1.0222 | 0.7833 |
|  | L-LDL-PL   | 0.2969 | 0.0774 | 0.3094 | 0.0484 | 1.0421 | 0.5838 |
|  | L-LDL-C    | 0.9521 | 0.2707 | 0.9728 | 0.1748 | 1.0217 | 0.7973 |
|  | L-LDL-CE   | 0.7097 | 0.2008 | 0.7104 | 0.1336 | 1.0009 | 0.9918 |
|  | L-LDL-FC   | 0.2425 | 0.0711 | 0.2618 | 0.0424 | 1.0793 | 0.3534 |
|  | L-LDL-TG   | 0.0773 | 0.0212 | 0.0742 | 0.0132 | 0.9599 | 0.6185 |
|  | M-LDL-P    | 0.0003 | 0.0001 | 0.0002 | 0.0000 | 0.9018 | 0.2851 |
|  | M-LDL-L    | 0.5553 | 0.1644 | 0.5264 | 0.1004 | 0.9478 | 0.5466 |
|  | M-LDL-PL   | 0.1458 | 0.0399 | 0.1423 | 0.0256 | 0.9756 | 0.7637 |
|  | M-LDL-C    | 0.3821 | 0.1179 | 0.3596 | 0.0722 | 0.9412 | 0.5149 |
|  | M-LDL-CE   | 0.2767 | 0.0912 | 0.2498 | 0.0545 | 0.9028 | 0.3124 |
|  | M-LDL-FC   | 0.1052 | 0.0295 | 0.1098 | 0.0191 | 1.0434 | 0.6026 |
|  | M-LDL-TG   | 0.0275 | 0.0081 | 0.0245 | 0.0048 | 0.8909 | 0.2066 |
|  | S-LDL-P    | 0.0001 | 0.0000 | 0.0001 | 0.0000 | 0.9636 | 0.6348 |
|  | S-LDL-L    | 0.2576 | 0.0673 | 0.2474 | 0.0385 | 0.9602 | 0.5956 |
|  | S-LDL-PL   | 0.0807 | 0.0195 | 0.0788 | 0.0109 | 0.9773 | 0.7411 |
|  | S-LDL-C    | 0.1636 | 0.0447 | 0.1582 | 0.0260 | 0.9671 | 0.6758 |
|  | S-LDL-CE   | 0.1169 | 0.0338 | 0.1101 | 0.0192 | 0.9415 | 0.4807 |
|  | S-LDL-FC   | 0.0467 | 0.0115 | 0.0482 | 0.0072 | 1.0316 | 0.6624 |
|  | S-LDL-TG   | 0.0135 | 0.0049 | 0.0103 | 0.0026 | 0.7630 | 0.0255 |
|  | XL-HDL-P   | 0.0002 | 0.0000 | 0.0002 | 0.0001 | 1.4029 | 0.0028 |
|  | XL-HDL-L   | 0.1203 | 0.0341 | 0.1787 | 0.0581 | 1.4853 | 0.0019 |
|  | XL-HDL-PL  | 0.0517 | 0.0185 | 0.0836 | 0.0319 | 1.6161 | 0.0019 |
|  | XL-HDL-C   | 0.0637 | 0.0160 | 0.0905 | 0.0258 | 1.4215 | 0.0016 |
|  | XL-HDL-CE  | 0.0455 | 0.0136 | 0.0683 | 0.0219 | 1.5003 | 0.0016 |
|  | XL-HDL-FC  | 0.0182 | 0.0030 | 0.0223 | 0.0041 | 1.2272 | 0.0029 |
|  | XL-HDL-TG  | 0.0049 | 0.0020 | 0.0045 | 0.0015 | 0.9229 | 0.5539 |
|  | L-HDL-P    | 0.0011 | 0.0005 | 0.0018 | 0.0007 | 1.6394 | 0.0031 |
|  | L-HDL-L    | 0.5121 | 0.2136 | 0.7974 | 0.2810 | 1.5572 | 0.0032 |
|  | L-HDL-PL   | 0.2559 | 0.1035 | 0.3864 | 0.1310 | 1.5102 | 0.0042 |
|  | L-HDL-C    | 0.2389 | 0.1103 | 0.3928 | 0.1485 | 1.6438 | 0.0026 |
|  | L-HDL-CE   | 0.1899 | 0.0880 | 0.3116 | 0.1174 | 1.6412 | 0.0026 |
|  | L-HDL-FC   | 0.0490 | 0.0231 | 0.0812 | 0.0313 | 1.6559 | 0.0027 |
|  | L-HDL-TG   | 0.0172 | 0.0085 | 0.0185 | 0.0078 | 1.0747 | 0.6577 |
|  | M-HDL-P    | 0.0035 | 0.0008 | 0.0042 | 0.0008 | 1.1942 | 0.0253 |
|  | M-HDL-L    | 0.9523 | 0.1985 | 1.0960 | 0.1928 | 1.1509 | 0.0466 |
|  | M-HDL-PL   | 0.4443 | 0.0898 | 0.4972 | 0.0807 | 1.1189 | 0.0898 |
|  | M-HDL-C    | 0.4677 | 0.1078 | 0.5686 | 0.1152 | 1.2159 | 0.0162 |
|  | M-HDL-CE   | 0.3903 | 0.0876 | 0.4729 | 0.0934 | 1.2115 | 0.0154 |
|  | M-HDL-FC   | 0.0774 | 0.0211 | 0.0959 | 0.0222 | 1.2377 | 0.0229 |
|  | M-HDL-TG   | 0.0392 | 0.0157 | 0.0303 | 0.0129 | 0.7725 | 0.0882 |
|  | S-HDL-P    | 0.0097 | 0.0009 | 0.0099 | 0.0009 | 1.0239 | 0.488  |
|  | S-HDL-L    | 1.1283 | 0.1176 | 1.1372 | 0.1081 | 1.0079 | 0.825  |
|  | S-HDL-PL   | 0.6335 | 0.0720 | 0.6358 | 0.0644 | 1.0036 | 0.925  |
|  | S-HDL-C    | 0.4488 | 0.0451 | 0.4672 | 0.0456 | 1.0411 | 0.2606 |
|  | S-HDL-CE   | 0.3394 | 0.0331 | 0.3523 | 0.0337 | 1.0380 | 0.2846 |
|  | S-HDL-FC   | 0.1095 | 0.0138 | 0.1150 | 0.0131 | 1.0504 | 0.2554 |
|  | S-HDL-TG   | 0.0456 | 0.0139 | 0.0335 | 0.0106 | 0.7352 | 0.0094 |

**Table SD1: Metabolites significantly associated with young post-pubertal cis-men and cis-women, Related to Figure 2B.** Mean, standard deviations and p values (multiple unpaired t-tests) from metabolite comparisons (Figure 2B) between young post-pubertal men (n=15) and women (n=17). Statistically significant p values following 6% false discovery rate adjustment for multiple comparisons (Benjamini, Krieger and Yekutieli approach) are highlighted in red. Abbreviations: Apo, apolipoprotein; VLDL, very low density lipoprotein; IDL, intermediate density lipoprotein; LDL, low density lipoprotein; HDL, high density lipoprotein; XXL-VLDL, chylomicrons and extremely large VLDL; X-Large, very large; X-small, very small; PG (Phosphoglyceride), DHA, Docosahexaenoic acid; LA, Linoleic acid; PUFA, Polyunsaturated fatty acids; MUFA, Monounsaturated fatty acids; SFA, Saturated fatty acids; TG, triglycerides; PL, phospholipids, FC, free cholesterol, C, cholesterol, CE, cholesterol esters; P, particle; L, lipids.



**Table SD2: Metabolites significantly altered by hormone treatment in young trans-women, Related to Figure 2C**

| Metabolite group      | Metabolite                                   | Mean (men)  | SD (men) | Mean (Trans-women) | SD (Trans-women) | Fold change (from men) | P value (t-test) |        |
|-----------------------|----------------------------------------------|-------------|----------|--------------------|------------------|------------------------|------------------|--------|
| Cholesterol (mmol/l)  | Total-C                                      | 3.8573      | 0.8579   | 4.3500             | 0.7797           | 1.1277                 | 0.0701           |        |
|                       | non-HDL-C                                    | 2.6387      | 0.8153   | 2.8732             | 0.6785           | 1.0889                 | 0.3327           |        |
|                       | Remnant-C                                    | 1.1409      | 0.3971   | 1.2659             | 0.3284           | 1.1095                 | 0.2882           |        |
|                       | VLDL-C                                       | 0.5232      | 0.2346   | 0.5248             | 0.1994           | 1.0031                 | 0.9813           |        |
|                       | Clinical LDL-C                               | 2.0653      | 0.6826   | 2.2528             | 0.5342           | 1.0908                 | 0.3394           |        |
|                       | LDL-C                                        | 1.4971      | 0.4271   | 1.6064             | 0.3589           | 1.0730                 | 0.3905           |        |
| HDL-C                 | HDL-C                                        | 1.2189      | 0.2620   | 1.4764             | 0.3253           | 1.2113                 | 0.0133           |        |
|                       | Total-TG                                     | 1.2637      | 0.5867   | 1.2017             | 0.5294           | 0.9509                 | 0.7325           |        |
|                       | VLDL-TG                                      | 0.9639      | 0.5106   | 0.8593             | 0.4445           | 0.8915                 | 0.4997           |        |
|                       | LDL-TG                                       | 0.1183      | 0.0336   | 0.1264             | 0.0340           | 1.0686                 | 0.4678           |        |
| HDL-TG                | HDL-TG                                       | 0.1069      | 0.0381   | 0.1305             | 0.0482           | 1.2212                 | 0.114            |        |
|                       | Phospholipids (mmol/l)                       | Total-PL    | 2.5013   | 0.4305             | 2.8240           | 0.4770                 | 1.1290           | 0.0383 |
|                       |                                              | VLDL-PL     | 0.3783   | 0.1782             | 0.3606           | 0.1542                 | 0.9534           | 0.7431 |
| LDL-PL                |                                              | 0.5233      | 0.1353   | 0.5542             | 0.1078           | 1.0589                 | 0.4314           |        |
| HDL-PL                | HDL-PL                                       | 1.3867      | 0.2613   | 1.6632             | 0.3425           | 1.1994                 | 0.0106           |        |
|                       | Cholesteryl esters (mmol/l)                  | Total-CE    | 2.8307   | 0.6127             | 3.1992           | 0.5559                 | 1.1302           | 0.0581 |
|                       |                                              | VLDL-CE     | 0.2990   | 0.1327             | 0.3087           | 0.1108                 | 1.0324           | 0.8052 |
| LDL-CE                |                                              | 1.1041      | 0.3194   | 1.1751             | 0.2780           | 1.0644                 | 0.4638           |        |
| HDL-CE                | HDL-CE                                       | 0.9649      | 0.2101   | 1.1581             | 0.2479           | 1.2002                 | 0.016            |        |
|                       | Free cholesterol (mmol/l)                    | Total-FC    | 1.0257   | 0.2511             | 1.1492           | 0.2262                 | 1.1204           | 0.1168 |
|                       |                                              | VLDL-FC     | 0.2241   | 0.1049             | 0.2162           | 0.0901                 | 0.9648           | 0.8026 |
| LDL-FC                |                                              | 0.3943      | 0.1114   | 0.4315             | 0.0838           | 1.0943                 | 0.2378           |        |
| HDL-FC                | HDL-FC                                       | 0.2541      | 0.0552   | 0.3180             | 0.0784           | 1.2518                 | 0.0086           |        |
|                       | Total lipids (mmol/l)                        | Total-L     | 7.6233   | 1.6180             | 8.3768           | 1.6226                 | 1.0988           | 0.1628 |
|                       |                                              | VLDL-L      | 1.8638   | 0.8787             | 1.7448           | 0.7741                 | 0.9362           | 0.6571 |
| LDL-L                 |                                              | 2.1400      | 0.5864   | 2.2868             | 0.4953           | 1.0686                 | 0.4023           |        |
| HDL-L                 | HDL-L                                        | 2.7113      | 0.5133   | 3.2692             | 0.6805           | 1.2058                 | 0.0094           |        |
|                       | Lipoprotein particle concentrations (mmol/l) | Total-P     | 0.0158   | 0.0021             | 0.0177           | 0.0024                 | 1.1223           | 0.0135 |
|                       |                                              | VLDL-P      | 0.0001   | 0.0000             | 0.0001           | 0.0000                 | 1.0182           | 0.8787 |
| LDL-P                 |                                              | 0.0010      | 0.0003   | 0.0010             | 0.0002           | 1.0232                 | 0.7751           |        |
| HDL-P                 | HDL-P                                        | 0.0145      | 0.0021   | 0.0163             | 0.0023           | 1.1297                 | 0.0136           |        |
|                       | Lipoprotein particle sizes (nm)              | VLDL size   | 39.5400  | 1.3168             | 38.7600          | 1.2024                 | 0.9803           | 0.0628 |
|                       |                                              | LDL size    | 23.8800  | 0.0862             | 23.9040          | 0.1020                 | 1.0010           | 0.4509 |
| HDL size              |                                              | 9.5427      | 0.1360   | 9.6896             | 0.1810           | 1.0154                 | 0.01             |        |
| Other lipids (mmol/l) | PG                                           | 2.0320      | 0.3469   | 2.3364             | 0.4302           | 1.1498                 | 0.0257           |        |
|                       | TG/PG                                        | 0.6153      | 0.2457   | 0.5097             | 0.1755           | 0.8284                 | 0.1215           |        |
|                       | Cholines                                     | 2.3167      | 0.3520   | 2.6248             | 0.4251           | 1.1330                 | 0.0235           |        |
|                       | Phosphatidylcho                              | 1.9180      | 0.3251   | 2.2296             | 0.4252           | 1.1625                 | 0.0196           |        |
| Sphingomyelins        | Sphingomyelins                               | 0.4077      | 0.0604   | 0.4494             | 0.0618           | 1.1023                 | 0.044            |        |
|                       | Apolipoproteins (g/l)                        | ApoB        | 0.6958   | 0.1976             | 0.7210           | 0.1576                 | 1.0362           | 0.6588 |
| ApoA1                 |                                              | 1.3467      | 0.2014   | 1.5564             | 0.2575           | 1.1557                 | 0.0104           |        |
| ApoB/ApoA1            |                                              | 0.5277      | 0.1727   | 0.4740             | 0.1169           | 0.8983                 | 0.2478           |        |
| Fatty acids (mmol/l)  |                                              | Total-FA    | 10.8300  | 2.4677             | 11.6440          | 2.5102                 | 1.0752           | 0.3241 |
|                       | Unsaturation                                 | 1.2720      | 0.0655   | 1.3000             | 0.0512           | 1.0220                 | 0.1402           |        |
|                       | Omega-3                                      | 0.3593      | 0.0983   | 0.4478             | 0.1923           | 1.2464                 | 0.1068           |        |
|                       | Omega-6                                      | 4.1287      | 0.6732   | 4.4120             | 0.6066           | 1.0686                 | 0.1779           |        |
|                       | PUFA                                         | 4.4873      | 0.7466   | 4.8604             | 0.7773           | 1.0831                 | 0.1442           |        |
|                       | MUFA                                         | 2.7093      | 0.8727   | 2.8680             | 0.7768           | 1.0586                 | 0.5539           |        |
|                       | SFA                                          | 3.6227      | 0.9593   | 3.9156             | 1.0546           | 1.0809                 | 0.385            |        |
|                       | LA                                           | 3.4193      | 0.6324   | 3.6440             | 0.5609           | 1.0657                 | 0.2496           |        |
|                       | DHA                                          | 0.1962      | 0.0314   | 0.2349             | 0.0576           | 1.1971                 | 0.022            |        |
|                       | Lipoprotein subclasses (mmol/l)              | XXL-VLDL-P  | 0.0000   | 0.0000             | 0.0000           | 0.0000                 | 0.7665           | 0.4041 |
|                       |                                              | XXL-VLDL-L  | 0.1859   | 0.1824             | 0.1363           | 0.1297                 | 0.7330           | 0.3215 |
|                       |                                              | XXL-VLDL-PL | 0.0241   | 0.0249             | 0.0171           | 0.0174                 | 0.7091           | 0.3009 |
|                       |                                              | XXL-VLDL-C  | 0.0422   | 0.0344             | 0.0323           | 0.0249                 | 0.7648           | 0.2977 |
| XXL-VLDL-CE           |                                              | 0.0257      | 0.0194   | 0.0199             | 0.0140           | 0.7746                 | 0.2811           |        |
| XXL-VLDL-FC           |                                              | 0.0165      | 0.0155   | 0.0124             | 0.0112           | 0.7510                 | 0.338            |        |
| XXL-VLDL-TG           |                                              | 0.1198      | 0.1245   | 0.0870             | 0.0899           | 0.7261                 | 0.3402           |        |
| XL-VLDL-P             |                                              | 0.0000      | 0.0000   | 0.0000             | 0.0000           | 0.8251                 | 0.3847           |        |
| XL-VLDL-L             |                                              | 0.2089      | 0.1404   | 0.1721             | 0.1206           | 0.8236                 | 0.3843           |        |
| XL-VLDL-PL            |                                              | 0.0352      | 0.0262   | 0.0280             | 0.0212           | 0.7938                 | 0.3423           |        |
| XL-VLDL-C             |                                              | 0.0472      | 0.0287   | 0.0395             | 0.0233           | 0.8365                 | 0.3583           |        |
| XL-VLDL-CE            |                                              | 0.0266      | 0.0146   | 0.0229             | 0.0121           | 0.8601                 | 0.3903           |        |
| XL-VLDL-FC            |                                              | 0.0206      | 0.0144   | 0.0166             | 0.0114           | 0.8063                 | 0.3382           |        |
| XL-VLDL-TG            |                                              | 0.1266      | 0.0878   | 0.1045             | 0.0775           | 0.8259                 | 0.4125           |        |
| L-VLDL-P              |                                              | 0.0000      | 0.0000   | 0.0000             | 0.0000           | 0.8526                 | 0.3825           |        |
| L-VLDL-L              |                                              | 0.3621      | 0.1984   | 0.3103             | 0.1757           | 0.8569                 | 0.3949           |        |
| L-VLDL-PL             |                                              | 0.0689      | 0.0414   | 0.0569             | 0.0355           | 0.8250                 | 0.3342           |        |
| L-VLDL-C              |                                              | 0.0884      | 0.0490   | 0.0770             | 0.0438           | 0.8703                 | 0.4475           |        |
| L-VLDL-CE             |                                              | 0.0429      | 0.0234   | 0.0388             | 0.0219           | 0.9052                 | 0.5828           |        |
| L-VLDL-FC             |                                              | 0.0456      | 0.0260   | 0.0382             | 0.0222           | 0.8371                 | 0.3429           |        |
| L-VLDL-TG             |                                              | 0.2048      | 0.1105   | 0.1764             | 0.0985           | 0.8610                 | 0.4032           |        |
| M-VLDL-P              |                                              | 0.0000      | 0.0000   | 0.0000             | 0.0000           | 0.9701                 | 0.8182           |        |
| M-VLDL-L              |                                              | 0.5295      | 0.2196   | 0.5103             | 0.1996           | 0.9636                 | 0.7776           |        |
| M-VLDL-PL             |                                              | 0.1055      | 0.0485   | 0.1043             | 0.0424           | 0.9891                 | 0.9378           |        |
| M-VLDL-C              |                                              | 0.1188      | 0.0610   | 0.1247             | 0.0467           | 1.0496                 | 0.7329           |        |
| M-VLDL-CE             |                                              | 0.0587      | 0.0345   | 0.0638             | 0.0235           | 1.0868                 | 0.5815           |        |
| M-VLDL-FC             |                                              | 0.0600      | 0.0287   | 0.0609             | 0.0247           | 1.0139                 | 0.9228           |        |
| M-VLDL-TG             |                                              | 0.3055      | 0.1315   | 0.2812             | 0.1202           | 0.9207                 | 0.5547           |        |
| S-VLDL-P              |                                              | 0.0000      | 0.0000   | 0.0000             | 0.0000           | 1.0011                 | 0.9923           |        |
| S-VLDL-L              |                                              | 0.3415      | 0.1215   | 0.3439             | 0.1169           | 1.0071                 | 0.9506           |        |
| S-VLDL-PL             |                                              | 0.0771      | 0.0283   | 0.0784             | 0.0258           | 1.0171                 | 0.8808           |        |
| S-VLDL-C              |                                              | 0.1119      | 0.0455   | 0.1133             | 0.0391           | 1.0129                 | 0.9157           |        |
| S-VLDL-CE             | 0.0672                                       | 0.0280      | 0.0675   | 0.0245             | 1.0054           | 0.9661                 |                  |        |
| S-VLDL-FC             | 0.0446                                       | 0.0176      | 0.0458   | 0.0148             | 1.0260           | 0.824                  |                  |        |
| S-VLDL-TG             | 0.1524                                       | 0.0577      | 0.1520   | 0.0574             | 0.9976           | 0.9842                 |                  |        |
| XS-VLDL-P             | 0.0000                                       | 0.0000      | 0.0000   | 0.0000             | 1.1483           | 0.1596                 |                  |        |

|            |        |        |        |        |        |        |
|------------|--------|--------|--------|--------|--------|--------|
| XS-VLDL-L  | 0.2359 | 0.0803 | 0.2726 | 0.0777 | 1.1552 | 0.1623 |
| XS-VLDL-PL | 0.0674 | 0.0247 | 0.0760 | 0.0229 | 1.1283 | 0.2688 |
| XS-VLDL-C  | 0.1147 | 0.0430 | 0.1380 | 0.0391 | 1.2036 | 0.0861 |
| XS-VLDL-CE | 0.0779 | 0.0304 | 0.0958 | 0.0268 | 1.2291 | 0.0596 |
| XS-VLDL-FC | 0.0367 | 0.0131 | 0.0423 | 0.0126 | 1.1512 | 0.1913 |
| XS-VLDL-TG | 0.0539 | 0.0172 | 0.0585 | 0.0178 | 1.0847 | 0.4318 |
| IDL-P      | 0.0002 | 0.0001 | 0.0003 | 0.0000 | 1.1080 | 0.1734 |
| IDL-L      | 0.9091 | 0.2695 | 1.0729 | 0.2270 | 1.1802 | 0.0463 |
| IDL-PL     | 0.2138 | 0.0637 | 0.2463 | 0.0513 | 1.1519 | 0.0849 |
| IDL-C      | 0.6180 | 0.1918 | 0.7411 | 0.1593 | 1.1992 | 0.0346 |
| IDL-CE     | 0.4629 | 0.1452 | 0.5574 | 0.1206 | 1.2043 | 0.0322 |
| IDL-FC     | 0.1550 | 0.0474 | 0.1837 | 0.0397 | 1.1855 | 0.0461 |
| IDL-TG     | 0.0768 | 0.0215 | 0.0853 | 0.0226 | 1.1108 | 0.2473 |
| L-LDL-P    | 0.0006 | 0.0002 | 0.0006 | 0.0001 | 1.0343 | 0.6592 |
| L-LDL-L    | 1.3267 | 0.3641 | 1.4608 | 0.3013 | 1.1011 | 0.2154 |
| L-LDL-PL   | 0.2969 | 0.0774 | 0.3239 | 0.0621 | 1.0911 | 0.2317 |
| L-LDL-C    | 0.9521 | 0.2707 | 1.0529 | 0.2224 | 1.1058 | 0.2089 |
| L-LDL-CE   | 0.7097 | 0.2008 | 0.7810 | 0.1707 | 1.1004 | 0.2392 |
| L-LDL-FC   | 0.2425 | 0.0711 | 0.2722 | 0.0537 | 1.1222 | 0.1433 |
| L-LDL-TG   | 0.0773 | 0.0212 | 0.0840 | 0.0218 | 1.0875 | 0.3439 |
| M-LDL-P    | 0.0003 | 0.0001 | 0.0003 | 0.0001 | 1.0028 | 0.9782 |
| M-LDL-L    | 0.5553 | 0.1644 | 0.5693 | 0.1494 | 1.0252 | 0.784  |
| M-LDL-PL   | 0.1458 | 0.0399 | 0.1498 | 0.0325 | 1.0275 | 0.731  |
| M-LDL-C    | 0.3821 | 0.1179 | 0.3907 | 0.1108 | 1.0225 | 0.8174 |
| M-LDL-CE   | 0.2767 | 0.0912 | 0.2789 | 0.0897 | 1.0080 | 0.9405 |
| M-LDL-FC   | 0.1052 | 0.0295 | 0.1118 | 0.0230 | 1.0627 | 0.4353 |
| M-LDL-TG   | 0.0275 | 0.0081 | 0.0288 | 0.0082 | 1.0468 | 0.6327 |
| S-LDL-P    | 0.0001 | 0.0000 | 0.0001 | 0.0000 | 1.0075 | 0.9219 |
| S-LDL-L    | 0.2576 | 0.0673 | 0.2576 | 0.0541 | 0.9998 | 0.9984 |
| S-LDL-PL   | 0.0807 | 0.0195 | 0.0804 | 0.0149 | 0.9964 | 0.9575 |
| S-LDL-C    | 0.1636 | 0.0447 | 0.1635 | 0.0358 | 0.9994 | 0.9942 |
| S-LDL-CE   | 0.1169 | 0.0338 | 0.1160 | 0.0274 | 0.9924 | 0.928  |
| S-LDL-FC   | 0.0467 | 0.0115 | 0.0476 | 0.0091 | 1.0184 | 0.7945 |
| S-LDL-TG   | 0.0135 | 0.0049 | 0.0136 | 0.0046 | 1.0076 | 0.9471 |
| XL-HDL-P   | 0.0002 | 0.0000 | 0.0002 | 0.0001 | 1.3577 | 0.0201 |
| XL-HDL-L   | 0.1203 | 0.0341 | 0.1681 | 0.0744 | 1.3973 | 0.0249 |
| XL-HDL-PL  | 0.0517 | 0.0185 | 0.0785 | 0.0416 | 1.5176 | 0.0242 |
| XL-HDL-C   | 0.0637 | 0.0160 | 0.0831 | 0.0317 | 1.3043 | 0.034  |
| XL-HDL-CE  | 0.0455 | 0.0136 | 0.0616 | 0.0258 | 1.3531 | 0.032  |
| XL-HDL-FC  | 0.0182 | 0.0030 | 0.0215 | 0.0061 | 1.1837 | 0.0544 |
| XL-HDL-TG  | 0.0049 | 0.0020 | 0.0065 | 0.0029 | 1.3302 | 0.0701 |
| L-HDL-P    | 0.0011 | 0.0005 | 0.0017 | 0.0008 | 1.5463 | 0.0129 |
| L-HDL-L    | 0.5121 | 0.2136 | 0.7625 | 0.3258 | 1.4891 | 0.0117 |
| L-HDL-PL   | 0.2559 | 0.1035 | 0.3779 | 0.1563 | 1.4769 | 0.0107 |
| L-HDL-C    | 0.2389 | 0.1103 | 0.3564 | 0.1623 | 1.4916 | 0.0179 |
| L-HDL-CE   | 0.1899 | 0.0880 | 0.2789 | 0.1253 | 1.4689 | 0.0208 |
| L-HDL-FC   | 0.0490 | 0.0231 | 0.0774 | 0.0373 | 1.5786 | 0.0116 |
| L-HDL-TG   | 0.0172 | 0.0085 | 0.0287 | 0.0147 | 1.6681 | 0.009  |
| M-HDL-P    | 0.0035 | 0.0008 | 0.0043 | 0.0010 | 1.2268 | 0.0102 |
| M-HDL-L    | 0.9523 | 0.1985 | 1.1407 | 0.2296 | 1.1979 | 0.012  |
| M-HDL-PL   | 0.4443 | 0.0898 | 0.5280 | 0.1024 | 1.1883 | 0.0127 |
| M-HDL-C    | 0.4677 | 0.1078 | 0.5643 | 0.1198 | 1.2066 | 0.0145 |
| M-HDL-CE   | 0.3903 | 0.0876 | 0.4652 | 0.0944 | 1.1918 | 0.0171 |
| M-HDL-FC   | 0.0774 | 0.0211 | 0.0991 | 0.0258 | 1.2793 | 0.0093 |
| M-HDL-TG   | 0.0392 | 0.0157 | 0.0486 | 0.0192 | 1.2406 | 0.1173 |
| S-HDL-P    | 0.0097 | 0.0009 | 0.0101 | 0.0008 | 1.0451 | 0.1366 |
| S-HDL-L    | 1.1283 | 0.1176 | 1.1979 | 0.1238 | 1.0617 | 0.0877 |
| S-HDL-PL   | 0.6335 | 0.0720 | 0.6789 | 0.0793 | 1.0716 | 0.0779 |
| S-HDL-C    | 0.4488 | 0.0451 | 0.4719 | 0.0373 | 1.0515 | 0.0876 |
| S-HDL-CE   | 0.3394 | 0.0331 | 0.3517 | 0.0247 | 1.0362 | 0.1884 |
| S-HDL-FC   | 0.1095 | 0.0138 | 0.1200 | 0.0153 | 1.0959 | 0.0354 |
| S-HDL-TG   | 0.0456 | 0.0139 | 0.0467 | 0.0148 | 1.0246 | 0.8133 |

**Table SD2: Metabolites significantly altered by hormone treatment in young trans-women, Related to Figure 2C.** Mean, standard deviations and p values (multiple unpaired t-tests) from metabolite comparisons (Figure 2C) between young post-pubertal men (n=15) and trans-women (n=25). Statistically significant p values following 6% false discovery rate adjustment for multiple comparisons (Benjamini, Krieger and Yekutieli approach) are highlighted in red. Abbreviations: Apo, apolipoprotein; VLDL, very low density lipoprotein; IDL, intermediate density lipoprotein; LDL, low density lipoprotein; HDL, high density lipoprotein; XXL-VLDL, chylomicrons and extremely large VLDL; X-Large, very large; X-small, very small; PG (Phosphoglyceride), DHA, Docosahexaenoic acid; LA, Linoleic acid; PUFA, Polyunsaturated fatty acids; MUFA, Monounsaturated fatty acids; SFA, Saturated fatty acids; TG, triglycerides; PL, phospholipids, FC, free cholesterol, C, cholesterol, CE, cholesterol esters; P, particle; L, lipids.

**Table SD3: Metabolites significantly altered by hormone treatment in young trans-men, Related to Figure 2D**

| Metabolite group                             | Metabolite                      | Mean (women) | SD (women) | Mean (Trans-men) | SD (Trans-men) | Fold change (from women) | P value (t-test) |        |
|----------------------------------------------|---------------------------------|--------------|------------|------------------|----------------|--------------------------|------------------|--------|
| Cholesterol (mmol/l)                         | Total-C                         | 4.1247       | 0.5856     | 3.7562           | 0.5842         | 0.9106                   | 0.0499           |        |
|                                              | non-HDL-C                       | 2.6047       | 0.5164     | 2.5846           | 0.4650         | 0.9923                   | 0.8951           |        |
|                                              | Remnant-C                       | 1.1165       | 0.2609     | 1.1256           | 0.2172         | 1.0082                   | 0.9018           |        |
|                                              | VLDL-C                          | 0.4096       | 0.1622     | 0.5034           | 0.1355         | 1.2290                   | 0.0465           |        |
|                                              | Clinical LDL-C                  | 2.1359       | 0.4249     | 2.0342           | 0.4175         | 0.9524                   | 0.4427           |        |
|                                              | LDL-C                           | 1.4912       | 0.2685     | 1.4602           | 0.2609         | 0.9792                   | 0.7089           |        |
|                                              | HDL-C                           | 1.5188       | 0.3117     | 1.1715           | 0.2289         | 0.7713                   | 0.0001           |        |
| Triglycerides (mmol/l)                       | Total-TG                        | 0.7899       | 0.3362     | 1.1312           | 0.5387         | 1.4321                   | 0.025            |        |
|                                              | VLDL-TG                         | 0.5219       | 0.2903     | 0.8335           | 0.4779         | 1.5970                   | 0.0206           |        |
|                                              | LDL-TG                          | 0.1090       | 0.0202     | 0.1185           | 0.0212         | 1.0866                   | 0.1541           |        |
|                                              | HDL-TG                          | 0.0868       | 0.0299     | 0.1005           | 0.0391         | 1.1570                   | 0.2289           |        |
| Phospholipids (mmol/l)                       | Total-PL                        | 2.6159       | 0.3327     | 2.3996           | 0.3137         | 0.9173                   | 0.0368           |        |
|                                              | VLDL-PL                         | 0.2570       | 0.1156     | 0.3514           | 0.1279         | 1.3675                   | 0.0184           |        |
|                                              | LDL-PL                          | 0.5305       | 0.0842     | 0.5160           | 0.0815         | 0.9727                   | 0.5768           |        |
|                                              | HDL-PL                          | 1.6029       | 0.2732     | 1.3135           | 0.2120         | 0.8194                   | 0.0003           |        |
| Cholesteryl esters (mmol/l)                  | Total-CE                        | 3.0641       | 0.4319     | 2.7523           | 0.4306         | 0.8982                   | 0.0255           |        |
|                                              | VLDL-CE                         | 0.2521       | 0.0932     | 0.2944           | 0.0699         | 1.1678                   | 0.0968           |        |
|                                              | LDL-CE                          | 1.0705       | 0.2039     | 1.0688           | 0.1918         | 0.9984                   | 0.9777           |        |
|                                              | HDL-CE                          | 1.2059       | 0.2489     | 0.9254           | 0.1807         | 0.7674                   | 0.0001           |        |
| Free cholesterol (mmol/l)                    | Total-FC                        | 1.0606       | 0.1600     | 1.0058           | 0.1578         | 0.9483                   | 0.2748           |        |
|                                              | VLDL-FC                         | 0.1573       | 0.0697     | 0.2090           | 0.0705         | 1.3287                   | 0.0231           |        |
|                                              | LDL-FC                          | 0.4198       | 0.0681     | 0.3915           | 0.0755         | 0.9324                   | 0.2183           |        |
|                                              | HDL-FC                          | 0.3142       | 0.0654     | 0.2464           | 0.0508         | 0.7842                   | 0.0004           |        |
| Total lipids (mmol/l)                        | Total-L                         | 7.5300       | 1.1029     | 7.2869           | 1.1234         | 0.9677                   | 0.4887           |        |
|                                              | VLDL-L                          | 1.1874       | 0.5555     | 1.6886           | 0.7170         | 1.4221                   | 0.0191           |        |
|                                              | LDL-L                           | 2.1294       | 0.3645     | 2.0958           | 0.3517         | 0.9842                   | 0.7639           |        |
|                                              | HDL-L                           | 3.2100       | 0.5770     | 2.5850           | 0.4275         | 0.8053                   | 0.0002           |        |
| Lipoprotein particle concentrations (mmol/l) | Total-P                         | 0.0174       | 0.0023     | 0.0149           | 0.0017         | 0.8563                   | 0.0002           |        |
|                                              | VLDL-P                          | 0.0001       | 0.0000     | 0.0001           | 0.0000         | 1.2112                   | 0.0457           |        |
|                                              | LDL-P                           | 0.0010       | 0.0002     | 0.0010           | 0.0002         | 1.0511                   | 0.334            |        |
|                                              | HDL-P                           | 0.0161       | 0.0022     | 0.0136           | 0.0017         | 0.8410                   | 0.0001           |        |
| Lipoprotein particle sizes (nm)              | VLDL size                       | 37.7353      | 1.1297     | 38.9885          | 1.5034         | 1.0332                   | 0.0055           |        |
|                                              | LDL size                        | 23.8824      | 0.0951     | 23.8769          | 0.1032         | 0.9998                   | 0.8628           |        |
|                                              | HDL size                        | 9.7165       | 0.1482     | 9.5692           | 0.1706         | 0.9848                   | 0.0058           |        |
| Other lipids (mmol/l)                        | PG                              | 2.1494       | 0.3075     | 1.9300           | 0.2750         | 0.8979                   | 0.019            |        |
|                                              | TG/PG                           | 0.3648       | 0.1384     | 0.5785           | 0.2412         | 1.5861                   | 0.002            |        |
|                                              | Cholines                        | 2.4759       | 0.3189     | 2.2185           | 0.2732         | 0.8960                   | 0.0072           |        |
|                                              | Phosphatidylcho                 | 2.0388       | 0.2929     | 1.8269           | 0.2665         | 0.8961                   | 0.0186           |        |
| Sphingomyelins                               | Sphingomyelins                  | 0.4422       | 0.0463     | 0.3962           | 0.0480         | 0.8959                   | 0.0033           |        |
|                                              | ApoB                            | 0.6640       | 0.1235     | 0.6938           | 0.1047         | 1.0448                   | 0.4008           |        |
|                                              | ApoA1                           | 1.5265       | 0.2214     | 1.2792           | 0.1603         | 0.8380                   | 0.0001           |        |
| Apolipoproteins (g/l)                        | ApoB/ApoA1                      | 0.4433       | 0.1042     | 0.5478           | 0.0941         | 1.2359                   | 0.0014           |        |
|                                              | Total-FA                        | 10.0488      | 1.6107     | 10.2650          | 1.8989         | 1.0215                   | 0.7009           |        |
| Fatty acids (mmol/l)                         | Unsaturation                    | 1.3188       | 0.0531     | 1.2542           | 0.0675         | 0.9510                   | 0.0019           |        |
|                                              | Omega-3                         | 0.3578       | 0.1290     | 0.3163           | 0.1254         | 0.8841                   | 0.3008           |        |
|                                              | Omega-6                         | 4.1665       | 0.5693     | 3.9496           | 0.4963         | 0.9480                   | 0.1936           |        |
|                                              | PUFA                            | 4.5247       | 0.6547     | 4.2662           | 0.5711         | 0.9429                   | 0.1782           |        |
|                                              | MUFA                            | 2.2794       | 0.4737     | 2.6608           | 0.7131         | 1.1673                   | 0.0594           |        |
|                                              | SFA                             | 3.2335       | 0.5712     | 3.3435           | 0.7713         | 1.0340                   | 0.6173           |        |
|                                              | LA                              | 3.5241       | 0.5940     | 3.2938           | 0.4925         | 0.9347                   | 0.1746           |        |
|                                              | DHA                             | 0.2298       | 0.0509     | 0.1874           | 0.0432         | 0.8157                   | 0.0055           |        |
|                                              | Lipoprotein subclasses (mmol/l) | XXL-VLDL-P   | 0.0000     | 0.0000           | 0.0000         | 0.0000                   | 4.0991           | 0.0171 |
|                                              |                                 | XXL-VLDL-L   | 0.0400     | 0.0680           | 0.1476         | 0.1693                   | 3.6922           | 0.0171 |
| XXL-VLDL-PL                                  |                                 | 0.0041       | 0.0090     | 0.0183           | 0.0234         | 4.4699                   | 0.0219           |        |
| XXL-VLDL-C                                   |                                 | 0.0138       | 0.0151     | 0.0331           | 0.0298         | 2.4077                   | 0.0176           |        |
| XXL-VLDL-CE                                  |                                 | 0.0100       | 0.0093     | 0.0204           | 0.0160         | 2.0402                   | 0.0198           |        |
| XXL-VLDL-FC                                  |                                 | 0.0038       | 0.0062     | 0.0127           | 0.0141         | 3.3853                   | 0.0182           |        |
| XXL-VLDL-TG                                  |                                 | 0.0222       | 0.0450     | 0.0961           | 0.1175         | 4.3383                   | 0.0177           |        |
| XL-VLDL-P                                    |                                 | 0.0000       | 0.0000     | 0.0000           | 0.0000         | 2.0880                   | 0.0102           |        |
| XL-VLDL-L                                    |                                 | 0.0832       | 0.0793     | 0.1766           | 0.1261         | 2.1214                   | 0.0096           |        |
| XL-VLDL-PL                                   |                                 | 0.0124       | 0.0142     | 0.0295           | 0.0224         | 2.3827                   | 0.008            |        |
| XL-VLDL-C                                    |                                 | 0.0244       | 0.0179     | 0.0409           | 0.0215         | 1.6737                   | 0.0124           |        |
| XL-VLDL-CE                                   |                                 | 0.0163       | 0.0100     | 0.0235           | 0.0100         | 1.4355                   | 0.0279           |        |
| XL-VLDL-FC                                   |                                 | 0.0081       | 0.0081     | 0.0174           | 0.0119         | 2.1583                   | 0.007            |        |
| XL-VLDL-TG                                   |                                 | 0.0465       | 0.0481     | 0.1062           | 0.0828         | 2.2866                   | 0.0104           |        |
| L-VLDL-P                                     |                                 | 0.0000       | 0.0000     | 0.0000           | 0.0000         | 1.6559                   | 0.0187           |        |
| L-VLDL-L                                     |                                 | 0.1832       | 0.1279     | 0.3085           | 0.1792         | 1.6834                   | 0.0168           |        |
| L-VLDL-PL                                    |                                 | 0.0320       | 0.0258     | 0.0583           | 0.0363         | 1.8245                   | 0.0131           |        |
| L-VLDL-C                                     |                                 | 0.0475       | 0.0336     | 0.0778           | 0.0405         | 1.6385                   | 0.0143           |        |
| L-VLDL-CE                                    |                                 | 0.0250       | 0.0171     | 0.0388           | 0.0189         | 1.5494                   | 0.0198           |        |
| L-VLDL-FC                                    |                                 | 0.0224       | 0.0166     | 0.0390           | 0.0221         | 1.7398                   | 0.0117           |        |
| L-VLDL-TG                                    |                                 | 0.1040       | 0.0700     | 0.1723           | 0.1038         | 1.6569                   | 0.0221           |        |
| M-VLDL-P                                     |                                 | 0.0000       | 0.0000     | 0.0000           | 0.0000         | 1.2185                   | 0.0848           |        |
| M-VLDL-L                                     |                                 | 0.3860       | 0.1602     | 0.4809           | 0.1686         | 1.2459                   | 0.073            |        |
| M-VLDL-PL                                    |                                 | 0.0814       | 0.0340     | 0.0987           | 0.0323         | 1.2120                   | 0.1014           |        |
| M-VLDL-C                                     |                                 | 0.1089       | 0.0417     | 0.1179           | 0.0343         | 1.0823                   | 0.4464           |        |
| M-VLDL-CE                                    |                                 | 0.0609       | 0.0219     | 0.0607           | 0.0204         | 0.9961                   | 0.9713           |        |
| M-VLDL-FC                                    |                                 | 0.0481       | 0.0205     | 0.0572           | 0.0180         | 1.1904                   | 0.1301           |        |
| M-VLDL-TG                                    |                                 | 0.1957       | 0.0899     | 0.2644           | 0.1204         | 1.3512                   | 0.0509           |        |
| S-VLDL-P                                     |                                 | 0.0000       | 0.0000     | 0.0000           | 0.0000         | 1.2431                   | 0.0364           |        |
| S-VLDL-L                                     |                                 | 0.2707       | 0.0902     | 0.3278           | 0.0921         | 1.2108                   | 0.0518           |        |
| S-VLDL-PL                                    |                                 | 0.0657       | 0.0207     | 0.0755           | 0.0184         | 1.1485                   | 0.1131           |        |
| S-VLDL-C                                     |                                 | 0.0970       | 0.0332     | 0.1123           | 0.0253         | 1.1578                   | 0.094            |        |
| S-VLDL-CE                                    |                                 | 0.0572       | 0.0211     | 0.0680           | 0.0152         | 1.1891                   | 0.057            |        |
| S-VLDL-FC                                    |                                 | 0.0399       | 0.0125     | 0.0442           | 0.0103         | 1.1081                   | 0.2247           |        |
| S-VLDL-TG                                    |                                 | 0.1079       | 0.0392     | 0.1401           | 0.0573         | 1.2990                   | 0.0492           |        |
| XS-VLDL-P                                    |                                 | 0.0000       | 0.0000     | 0.0000           | 0.0000         | 1.0609                   | 0.3139           |        |
| XS-VLDL-L                                    |                                 | 0.2250       | 0.0574     | 0.2468           | 0.0413         | 1.0969                   | 0.1547           |        |

|  |            |        |        |        |        |        |        |
|--|------------|--------|--------|--------|--------|--------|--------|
|  | XS-VLDL-PL | 0.0615 | 0.0184 | 0.0711 | 0.0122 | 1.1562 | 0.0454 |
|  | XS-VLDL-C  | 0.1179 | 0.0283 | 0.1215 | 0.0241 | 1.0308 | 0.6553 |
|  | XS-VLDL-CE | 0.0826 | 0.0191 | 0.0829 | 0.0178 | 1.0032 | 0.9628 |
|  | XS-VLDL-FC | 0.0352 | 0.0094 | 0.0385 | 0.0067 | 1.0947 | 0.183  |
|  | XS-VLDL-TG | 0.0457 | 0.0126 | 0.0543 | 0.0132 | 1.1886 | 0.0393 |
|  | IDL-P      | 0.0002 | 0.0000 | 0.0002 | 0.0000 | 0.9551 | 0.415  |
|  | IDL-L      | 1.0041 | 0.1655 | 0.9192 | 0.1686 | 0.9155 | 0.1116 |
|  | IDL-PL     | 0.2263 | 0.0359 | 0.2184 | 0.0372 | 0.9652 | 0.4957 |
|  | IDL-C      | 0.7058 | 0.1231 | 0.6213 | 0.1291 | 0.8803 | 0.0387 |
|  | IDL-CE     | 0.5323 | 0.0972 | 0.4625 | 0.0967 | 0.8688 | 0.0259 |
|  | IDL-FC     | 0.1735 | 0.0264 | 0.1588 | 0.0335 | 0.9157 | 0.1371 |
|  | IDL-TG     | 0.0725 | 0.0143 | 0.0788 | 0.0127 | 1.0862 | 0.1411 |
|  | L-LDL-P    | 0.0006 | 0.0001 | 0.0006 | 0.0001 | 1.0369 | 0.4847 |
|  | L-LDL-L    | 1.3562 | 0.2299 | 1.3059 | 0.2267 | 0.9629 | 0.4829 |
|  | L-LDL-PL   | 0.3094 | 0.0484 | 0.2930 | 0.0476 | 0.9471 | 0.2804 |
|  | L-LDL-C    | 0.9728 | 0.1748 | 0.9350 | 0.1742 | 0.9611 | 0.4911 |
|  | L-LDL-CE   | 0.7104 | 0.1336 | 0.6950 | 0.1288 | 0.9783 | 0.7077 |
|  | L-LDL-FC   | 0.2618 | 0.0424 | 0.2403 | 0.0483 | 0.9182 | 0.1439 |
|  | L-LDL-TG   | 0.0742 | 0.0132 | 0.0782 | 0.0121 | 1.0546 | 0.3068 |
|  | M-LDL-P    | 0.0002 | 0.0000 | 0.0003 | 0.0001 | 1.0976 | 0.1411 |
|  | M-LDL-L    | 0.5264 | 0.1004 | 0.5356 | 0.0988 | 1.0175 | 0.7677 |
|  | M-LDL-PL   | 0.1423 | 0.0256 | 0.1418 | 0.0249 | 0.9969 | 0.9563 |
|  | M-LDL-C    | 0.3596 | 0.0722 | 0.3663 | 0.0705 | 1.0188 | 0.7624 |
|  | M-LDL-CE   | 0.2498 | 0.0545 | 0.2624 | 0.0546 | 1.0505 | 0.4624 |
|  | M-LDL-FC   | 0.1098 | 0.0191 | 0.1039 | 0.0200 | 0.9468 | 0.3457 |
|  | M-LDL-TG   | 0.0245 | 0.0048 | 0.0272 | 0.0057 | 1.1107 | 0.1144 |
|  | S-LDL-P    | 0.0001 | 0.0000 | 0.0001 | 0.0000 | 1.0400 | 0.4329 |
|  | S-LDL-L    | 0.2474 | 0.0385 | 0.2532 | 0.0386 | 1.0238 | 0.6276 |
|  | S-LDL-PL   | 0.0788 | 0.0109 | 0.0811 | 0.0116 | 1.0288 | 0.5233 |
|  | S-LDL-C    | 0.1582 | 0.0260 | 0.1592 | 0.0256 | 1.0063 | 0.9021 |
|  | S-LDL-CE   | 0.1101 | 0.0192 | 0.1120 | 0.0185 | 1.0171 | 0.7507 |
|  | S-LDL-FC   | 0.0482 | 0.0072 | 0.0472 | 0.0083 | 0.9806 | 0.7071 |
|  | S-LDL-TG   | 0.0103 | 0.0026 | 0.0130 | 0.0041 | 1.2635 | 0.0211 |
|  | XL-HDL-P   | 0.0002 | 0.0001 | 0.0002 | 0.0001 | 0.7831 | 0.0236 |
|  | XL-HDL-L   | 0.1787 | 0.0581 | 0.1358 | 0.0616 | 0.7602 | 0.028  |
|  | XL-HDL-PL  | 0.0836 | 0.0319 | 0.0604 | 0.0340 | 0.7227 | 0.0305 |
|  | XL-HDL-C   | 0.0905 | 0.0258 | 0.0705 | 0.0281 | 0.7783 | 0.0229 |
|  | XL-HDL-CE  | 0.0683 | 0.0219 | 0.0502 | 0.0223 | 0.7352 | 0.0124 |
|  | XL-HDL-FC  | 0.0223 | 0.0041 | 0.0203 | 0.0059 | 0.9088 | 0.2237 |
|  | XL-HDL-TG  | 0.0045 | 0.0015 | 0.0051 | 0.0018 | 1.1269 | 0.2926 |
|  | L-HDL-P    | 0.0018 | 0.0007 | 0.0011 | 0.0006 | 0.6198 | 0.001  |
|  | L-HDL-L    | 0.7974 | 0.2810 | 0.5185 | 0.2318 | 0.6502 | 0.001  |
|  | L-HDL-PL   | 0.3864 | 0.1310 | 0.2548 | 0.1066 | 0.6595 | 0.0008 |
|  | L-HDL-C    | 0.3928 | 0.1485 | 0.2466 | 0.1258 | 0.6278 | 0.0012 |
|  | L-HDL-CE   | 0.3116 | 0.1174 | 0.1951 | 0.0982 | 0.6260 | 0.0011 |
|  | L-HDL-FC   | 0.0812 | 0.0313 | 0.0515 | 0.0278 | 0.6344 | 0.0023 |
|  | L-HDL-TG   | 0.0185 | 0.0078 | 0.0170 | 0.0080 | 0.9176 | 0.5422 |
|  | M-HDL-P    | 0.0042 | 0.0008 | 0.0032 | 0.0006 | 0.7718 | 0.0001 |
|  | M-HDL-L    | 1.0960 | 0.1928 | 0.8802 | 0.1517 | 0.8031 | 0.0002 |
|  | M-HDL-PL   | 0.4972 | 0.0807 | 0.4116 | 0.0703 | 0.8279 | 0.0007 |
|  | M-HDL-C    | 0.5686 | 0.1152 | 0.4333 | 0.0822 | 0.7620 | 0.0001 |
|  | M-HDL-CE   | 0.4729 | 0.0934 | 0.3622 | 0.0658 | 0.7659 | 0.0001 |
|  | M-HDL-FC   | 0.0959 | 0.0222 | 0.0712 | 0.0169 | 0.7428 | 0.0002 |
|  | M-HDL-TG   | 0.0303 | 0.0129 | 0.0355 | 0.0165 | 1.1718 | 0.2789 |
|  | S-HDL-P    | 0.0099 | 0.0009 | 0.0091 | 0.0010 | 0.9131 | 0.0059 |
|  | S-HDL-L    | 1.1372 | 0.1081 | 1.0508 | 0.1234 | 0.9240 | 0.0235 |
|  | S-HDL-PL   | 0.6358 | 0.0644 | 0.5868 | 0.0743 | 0.9229 | 0.0317 |
|  | S-HDL-C    | 0.4672 | 0.0456 | 0.4210 | 0.0438 | 0.9011 | 0.0019 |
|  | S-HDL-CE   | 0.3523 | 0.0337 | 0.3175 | 0.0336 | 0.9013 | 0.0019 |
|  | S-HDL-FC   | 0.1150 | 0.0131 | 0.1034 | 0.0113 | 0.8992 | 0.0037 |
|  | S-HDL-TG   | 0.0335 | 0.0106 | 0.0430 | 0.0147 | 1.2810 | 0.0281 |

**Table SD3: Metabolites significantly altered by hormone treatment in young trans-men, Related to Figure 2D.** Mean, standard deviations and p values (multiple unpaired t-tests) from metabolite comparisons (Figure 2D) between young post-pubertal women (n=17) and trans-men (n=26). Statistically significant p values following 6% false discovery rate adjustment for multiple comparisons (Benjamini, Krieger and Yekutieli approach) are highlighted in red. Abbreviations: Apo, apolipoprotein; VLDL, very low density lipoprotein; IDL, intermediate density lipoprotein; LDL, low density lipoprotein; HDL, high density lipoprotein; XXL-VLDL, chylomicrons and extremely large VLDL; X-Large, very large; X-small, very small; PG (Phosphoglyceride), DHA, Docosahexaenoic acid; LA, Linoleic acid; PUFA, Polyunsaturated fatty acids; MUFA, Monounsaturated fatty acids; SFA, Saturated fatty acids; TG, triglycerides; PL, phospholipids, FC, free cholesterol, C, cholesterol, CE, cholesterol esters; P, particle; L, lipids.

**Table SD4: List of non-significant p values from the comparison of cis-men vs trans-men and cis-women vs trans-women, Related to Figure 2.**

| Metabolite group                             | Metabolite                      | Cis-men vs Trans-men (adjusted p value) | Cis-women vs Trans-women (adjusted p value) |
|----------------------------------------------|---------------------------------|-----------------------------------------|---------------------------------------------|
| Cholesterol (mmol/l)                         | Total-C                         | 0.4933                                  | 0.4933                                      |
|                                              | non-HDL-C                       | 0.3480                                  | 0.3480                                      |
|                                              | Remnant-C                       | 0.2818                                  | 0.2818                                      |
|                                              | VLDL-C                          | 0.1720                                  | 0.1720                                      |
|                                              | Clinical LDL-C                  | 0.6282                                  | 0.6282                                      |
|                                              | LDL-C                           | 0.4469                                  | 0.4469                                      |
| Triglycerides (mmol/l)                       | HDL-C                           | 0.7754                                  | 0.7754                                      |
|                                              | Total-TG                        | 0.0800                                  | 0.0800                                      |
|                                              | VLDL-TG                         | 0.0800                                  | 0.0800                                      |
|                                              | LDL-TG                          | 0.1907                                  | 0.1907                                      |
| Phospholipids (mmol/l)                       | HDL-TG                          | 0.0800                                  | 0.0800                                      |
|                                              | Total-PL                        | 0.2832                                  | 0.2832                                      |
|                                              | VLDL-PL                         | 0.1030                                  | 0.1030                                      |
|                                              | LDL-PL                          | 0.6282                                  | 0.6282                                      |
| Cholesteryl esters (mmol/l)                  | HDL-PL                          | 0.6865                                  | 0.6865                                      |
|                                              | Total-CE                        | 0.5967                                  | 0.5967                                      |
|                                              | VLDL-CE                         | 0.2278                                  | 0.2278                                      |
| Free cholesterol (mmol/l)                    | LDL-CE                          | 0.3716                                  | 0.3716                                      |
|                                              | HDL-CE                          | 0.6859                                  | 0.6859                                      |
|                                              | Total-FC                        | 0.3473                                  | 0.3473                                      |
|                                              | VLDL-FC                         | 0.1150                                  | 0.1150                                      |
| Total lipids (mmol/l)                        | LDL-FC                          | 0.7637                                  | 0.7637                                      |
|                                              | HDL-FC                          | 0.8818                                  | 0.8818                                      |
|                                              | Total-L                         | 0.1907                                  | 0.1907                                      |
|                                              | VLDL-L                          | 0.0802                                  | 0.0802                                      |
| Lipoprotein particle concentrations (mmol/l) | LDL-L                           | 0.4469                                  | 0.4469                                      |
|                                              | HDL-L                           | 0.8100                                  | 0.8100                                      |
|                                              | Total-P                         | 0.7754                                  | 0.7754                                      |
|                                              | VLDL-P                          | 0.1205                                  | 0.1205                                      |
| Lipoprotein particle sizes (nm)              | LDL-P                           | 0.4259                                  | 0.4259                                      |
|                                              | HDL-P                           | 0.8217                                  | 0.8217                                      |
|                                              | VLDL size                       | 0.0800                                  | 0.0800                                      |
| Other lipids (mmol/l)                        | LDL size                        | 0.6487                                  | 0.6487                                      |
|                                              | HDL size                        | 0.7512                                  | 0.7512                                      |
|                                              | PG                              | 0.2871                                  | 0.2871                                      |
|                                              | TG/PG                           | 0.0800                                  | 0.0800                                      |
| Apolipoproteins (g/l)                        | Cholines                        | 0.4126                                  | 0.4126                                      |
|                                              | Phosphatidylcho                 | 0.2663                                  | 0.2663                                      |
|                                              | Sphingomyelins                  | 0.7754                                  | 0.7754                                      |
|                                              | ApoB                            | 0.4105                                  | 0.4105                                      |
|                                              | ApoA1                           | 0.7762                                  | 0.7762                                      |
| Fatty acids (mmol/l)                         | ApoB/ApoA1                      | 0.5834                                  | 0.5834                                      |
|                                              | Total-FA                        | 0.1077                                  | 0.1077                                      |
|                                              | Unsaturation                    | 0.4391                                  | 0.4391                                      |
|                                              | Omega-3                         | 0.2393                                  | 0.2393                                      |
|                                              | Omega-6                         | 0.3716                                  | 0.3716                                      |
|                                              | PUFA                            | 0.3276                                  | 0.3276                                      |
|                                              | MUFA                            | 0.0800                                  | 0.0800                                      |
|                                              | SFA                             | 0.0891                                  | 0.0891                                      |
|                                              | LA                              | 0.6541                                  | 0.6541                                      |
|                                              | DHA                             | 0.8100                                  | 0.8100                                      |
|                                              | Lipoprotein subclasses (mmol/l) | XXL-VLDL-P                              | 0.0800                                      |
| XXL-VLDL-L                                   |                                 | 0.0800                                  | 0.0800                                      |
| XXL-VLDL-PL                                  |                                 | 0.0800                                  | 0.0800                                      |
| XXL-VLDL-C                                   |                                 | 0.0800                                  | 0.0800                                      |
| XXL-VLDL-CE                                  |                                 | 0.0802                                  | 0.0802                                      |
| XXL-VLDL-FC                                  |                                 | 0.0800                                  | 0.0800                                      |
| XXL-VLDL-TG                                  |                                 | 0.0800                                  | 0.0800                                      |
| XL-VLDL-P                                    |                                 | 0.0800                                  | 0.0800                                      |
| XL-VLDL-L                                    |                                 | 0.0800                                  | 0.0800                                      |
| XL-VLDL-PL                                   |                                 | 0.0800                                  | 0.0800                                      |
| XL-VLDL-C                                    |                                 | 0.1172                                  | 0.1172                                      |
| XL-VLDL-CE                                   |                                 | 0.1982                                  | 0.1982                                      |
| XL-VLDL-FC                                   |                                 | 0.0800                                  | 0.0800                                      |
| XL-VLDL-TG                                   |                                 | 0.0800                                  | 0.0800                                      |
| L-VLDL-P                                     |                                 | 0.0817                                  | 0.0817                                      |
| L-VLDL-L                                     |                                 | 0.0802                                  | 0.0802                                      |
| L-VLDL-PL                                    |                                 | 0.0818                                  | 0.0818                                      |
| L-VLDL-C                                     |                                 | 0.1030                                  | 0.1030                                      |
| L-VLDL-CE                                    |                                 | 0.1234                                  | 0.1234                                      |
| L-VLDL-FC                                    |                                 | 0.0817                                  | 0.0817                                      |
| L-VLDL-TG                                    |                                 | 0.0802                                  | 0.0802                                      |
| M-VLDL-P                                     |                                 | 0.1838                                  | 0.1838                                      |
| M-VLDL-L                                     |                                 | 0.1280                                  | 0.1280                                      |
| M-VLDL-PL                                    |                                 | 0.1907                                  | 0.1907                                      |
| M-VLDL-C                                     |                                 | 0.4469                                  | 0.4469                                      |
| M-VLDL-CE                                    |                                 | 0.7754                                  | 0.7754                                      |
| M-VLDL-FC                                    |                                 | 0.2199                                  | 0.2199                                      |
| M-VLDL-TG                                    |                                 | 0.0817                                  | 0.0817                                      |
| S-VLDL-P                                     |                                 | 0.1205                                  | 0.1205                                      |
| S-VLDL-L                                     |                                 | 0.1234                                  | 0.1234                                      |
| S-VLDL-PL                                    |                                 | 0.2388                                  | 0.2388                                      |
| S-VLDL-C                                     |                                 | 0.3462                                  | 0.3462                                      |
| S-VLDL-CE                                    |                                 | 0.3462                                  | 0.3462                                      |
| S-VLDL-FC                                    |                                 | 0.3575                                  | 0.3575                                      |
| S-VLDL-TG                                    |                                 | 0.0800                                  | 0.0800                                      |
| XS-VLDL-P                                    |                                 | 0.1849                                  | 0.1849                                      |
| XS-VLDL-L                                    |                                 | 0.1269                                  | 0.1269                                      |

|            |        |        |
|------------|--------|--------|
| XS-VLDL-PL | 0.1234 | 0.1234 |
| XS-VLDL-C  | 0.1982 | 0.1982 |
| XS-VLDL-CE | 0.2251 | 0.2251 |
| XS-VLDL-FC | 0.1720 | 0.1720 |
| XS-VLDL-TG | 0.0802 | 0.0802 |
| IDL-P      | 0.7120 | 0.7120 |
| IDL-L      | 0.4716 | 0.4716 |
| IDL-PL     | 0.3473 | 0.3473 |
| IDL-C      | 0.6259 | 0.6259 |
| IDL-CE     | 0.6397 | 0.6397 |
| IDL-FC     | 0.5483 | 0.5483 |
| IDL-TG     | 0.1491 | 0.1491 |
| L-LDL-P    | 0.4250 | 0.4250 |
| L-LDL-L    | 0.4191 | 0.4191 |
| L-LDL-PL   | 0.6112 | 0.6112 |
| L-LDL-C    | 0.4105 | 0.4105 |
| L-LDL-CE   | 0.3408 | 0.3408 |
| L-LDL-FC   | 0.6541 | 0.6541 |
| L-LDL-TG   | 0.2452 | 0.2452 |
| M-LDL-P    | 0.4126 | 0.4126 |
| M-LDL-L    | 0.4861 | 0.4861 |
| M-LDL-PL   | 0.6112 | 0.6112 |
| M-LDL-C    | 0.4933 | 0.4933 |
| M-LDL-CE   | 0.4246 | 0.4246 |
| M-LDL-FC   | 0.8100 | 0.8100 |
| M-LDL-TG   | 0.1833 | 0.1833 |
| S-LDL-P    | 0.6397 | 0.6397 |
| S-LDL-L    | 0.6541 | 0.6541 |
| S-LDL-PL   | 0.7842 | 0.7842 |
| S-LDL-C    | 0.7452 | 0.7452 |
| S-LDL-CE   | 0.6259 | 0.6259 |
| S-LDL-FC   | 0.8378 | 0.8378 |
| S-LDL-TG   | 0.0800 | 0.0800 |
| XL-HDL-P   | 0.8100 | 0.8100 |
| XL-HDL-L   | 0.7570 | 0.7570 |
| XL-HDL-PL  | 0.7754 | 0.7754 |
| XL-HDL-C   | 0.6112 | 0.6112 |
| XL-HDL-CE  | 0.5834 | 0.5834 |
| XL-HDL-FC  | 0.7649 | 0.7649 |
| XL-HDL-TG  | 0.0802 | 0.0802 |
| L-HDL-P    | 0.7754 | 0.7754 |
| L-HDL-L    | 0.7842 | 0.7842 |
| L-HDL-PL   | 0.8717 | 0.8717 |
| L-HDL-C    | 0.6303 | 0.6303 |
| L-HDL-CE   | 0.5951 | 0.5951 |
| L-HDL-FC   | 0.7910 | 0.7910 |
| L-HDL-TG   | 0.0802 | 0.0802 |
| M-HDL-P    | 0.7754 | 0.7754 |
| M-HDL-L    | 0.6541 | 0.6541 |
| M-HDL-PL   | 0.4861 | 0.4861 |
| M-HDL-C    | 0.9130 | 0.9130 |
| M-HDL-CE   | 0.8239 | 0.8239 |
| M-HDL-FC   | 0.7754 | 0.7754 |
| M-HDL-TG   | 0.0800 | 0.0800 |
| S-HDL-P    | 0.6303 | 0.6303 |
| S-HDL-L    | 0.2538 | 0.2538 |
| S-HDL-PL   | 0.1907 | 0.1907 |
| S-HDL-C    | 0.7842 | 0.7842 |
| S-HDL-CE   | 0.9459 | 0.9459 |
| S-HDL-FC   | 0.4560 | 0.4560 |
| S-HDL-TG   | 0.0800 | 0.0800 |

**Table SD4: List of non-significant p values from the comparison of cis-men vs trans-men and cis-women vs trans-women, Related to Figure 2.** List of adjusted p values following 6% false discovery rate correction (Benjamini, Krieger and Yekutieli approach) from multiple unpaired t-tests of metabolite comparisons between young post-pubertal cis-men (n=15) and trans-men (n=26), or cis-women (n=17) and trans-women (n=25). Abbreviations: Apo, apolipoprotein; VLDL, very low density lipoprotein; IDL, intermediate density lipoprotein; LDL, low density lipoprotein; HDL, high density lipoprotein; XXL-VLDL, chylomicrons and extremely large VLDL; X-Large, very large; X-small, very small; PG (Phosphoglyceride), DHA, Docosaehaenoic acid; LA, Linoleic acid; PUFA, Polyunsaturated fatty acids; MUFA, Monounsaturated fatty acids; SFA, Saturated fatty acids; TG, triglycerides; PL, phospholipids, FC, free cholesterol, C, cholesterol, CE, cholesterol esters; P, particle; L, lipids.
